# Supplementary material for: Condensate-Promoting ENL Mutation Drives Tumorigenesis In Vivo Through Dynamic Regulation of Histone Modifications and Gene Expression
Source: PubMed Central journal article supplement — Cancer Discov. 2024 Apr 23;14(8):1522–46. doi: 10.1158/2159-8290.CD-23-0876 (PMC11294821; doi:10.1158/2159-8290.cd-23-0876), 2024-04-23
Supplement: cd-23-0876_supplementary_figures_s1-s24_suppsf1.pdf [file cd-23-0876_supplementary_figures_s1-s24_suppsf1.pdf]

1 **Supplementary Data for**

2 **Condensate-promoting ENL mutation drives tumorigenesis *in vivo* through**  
3 **dynamic regulation of histone modifications and gene expression**  
4

5 Yiman Liu<sup>1, 2, 15</sup>, Qinglan Li<sup>1, 2, 15</sup>, Lele Song<sup>1, 2</sup>, Chujie Gong<sup>1, 2, 3</sup>, Sylvia Tang<sup>1, 2</sup>, Krista A. Budinich<sup>1,</sup>  
6 <sup>2, 4</sup>, Ashley Vanderbeck<sup>5, 6, 7</sup>, Kaeli M. Mathias<sup>1, 2, 8, 9</sup>, Gerald B. Wertheim<sup>10, 11</sup>, Son C. Nguyen<sup>12, 13</sup>,  
7 Riley Outen<sup>7</sup>, Eric F. Joyce<sup>12, 13</sup>, Ivan Maillard<sup>7</sup>, Liling Wan<sup>1, 2, 12, 14, #</sup>

8  
9 <sup>1</sup>Department of Cancer Biology, Perelman School of Medicine, University of Pennsylvania,  
10 Philadelphia, PA, 19104, USA

11  
12 <sup>2</sup>Abramson Family Cancer Research Institute, Perelman School of Medicine, University of  
13 Pennsylvania, Philadelphia, PA, 19104, USA

14  
15 <sup>3</sup>Cell and Molecular Biology Graduate Group, Perelman School of Medicine, University of Pennsylvania,  
16 Philadelphia, PA, 19104, USA

17  
18 <sup>4</sup>Cancer Biology Graduate Group, Perelman School of Medicine, University of Pennsylvania,  
19 Philadelphia, PA, 19104, USA

20  
21 <sup>5</sup>VMD-PhD program, School of Veterinary Medicine, University of Pennsylvania, PA 19104, USA

22  
23 <sup>6</sup>Immunology Graduate Group, Perelman School of Medicine, University of Pennsylvania, Philadelphia,  
24 PA, 19104, USA

25  
26 <sup>7</sup>Division of Hematology/Oncology, Department of Medicine, Perelman School of Medicine,  
27 University of Pennsylvania, Philadelphia, PA 19104, USA

28  
29 <sup>8</sup>Biochemistry and Molecular Biophysics Graduate Group, Perelman School of Medicine, University of  
30 Pennsylvania, Philadelphia, PA, 19104, USA

31  
32 <sup>9</sup>Center for Computational and Genomic Medicine, The Children's Hospital of Philadelphia,  
33 Philadelphia, PA 19104, USA

34  
35 <sup>10</sup>Department of Pathology and Laboratory Medicine, Department of Medicine, Perelman School of  
36 Medicine, University of Pennsylvania, Philadelphia, PA 19104, USA

37  
38 <sup>11</sup>Division of Hematopathology, The Children's Hospital of Philadelphia, Philadelphia, PA 19104,  
39 USA

40  
41 <sup>12</sup>Epigenetics Institute, Perelman School of Medicine, University of Pennsylvania, Philadelphia, PA,  
42 19104, USA.

43  
44 <sup>13</sup>Department of Genetics, Perelman School of Medicine, University of Pennsylvania, Philadelphia,  
45 PA, 19104, USA

47 <sup>14</sup>Institute for Regenerative Medicine, Perelman School of Medicine, University of Pennsylvania,  
48 Philadelphia, PA, 19104, USA

49  
50 <sup>15</sup>These authors contributed equally

51  
52 #Corresponding Authors:  
53 Liling Wan, University of Pennsylvania, BRB II/III, RM751, 421 Curie Blvd, Philadelphia, PA 19104.  
54 Phone: 215-898-3116; E-mail: [Liling.Wan@Pennmedicine.upenn.edu](mailto:Liling.Wan@Pennmedicine.upenn.edu)

55  
56  
57 **Running title: Condensate-promoting ENL mutations as a driver of AML**

58 **Keywords:** transcriptional condensates, acute myeloid leukemia, ENL mutations, histone acetylation,  
59 histone methylation, hematopoietic development, small-molecule inhibitor

60 **Conflict of Interest:** L.W. is a co-inventor on a patent filed (US No. 62/949,160) related to the inhibitor  
61 used in this manuscript and is a consultant for Bridge Medicines. I.M. has received research funding  
62 from Genentech and Regeneron and serves on the scientific advisory board of Garuda Therapeutics (all  
63 unrelated to the contents of this manuscript). Other authors declare that they have no competing financial  
64 interests.

65  
66  
67  
68  
69  
70  
71  
72  
73  
74  
75  
76  
77  
78  
79  
80

81 **Supplementary Figures with Legends**

82 Supplementary Figure S1. Generation of a conditional knock-in mouse model for the *Enl*-T1 mutation.

83 Supplementary Figure S2. Impact of *Enl* mutation on the peripheral blood and spleen.

84 Supplementary Figure S3. Characterization of *Enl*-T1 allele expression and concurrent mutations in  
85 heterozygous knock-in *Enl*-T1 mouse model.

86 Supplementary Figure S4. UBC-cre-ERT2/*Enl*<sup>flox-T1/+</sup> mice develop aggressive acute leukemia  
87 following tamoxifen treatment.

88 Supplementary Figure S5. *Enl* mutation leads to expansion of myeloid cells in mice in the leukemic  
89 phase.

90 Supplementary Figure S6. *Enl* mutation leads to the decrease of B220<sup>+</sup>CD19<sup>+</sup> B, CD4<sup>+</sup>T, CD8<sup>+</sup> T cells  
91 in mice in the leukemic phase.

92 Supplementary Figure S7. Impact of the *Enl* mutation on the bone marrow, peripheral blood, spleen, and  
93 thymus in mice in the pre-leukemic phase.

94 Supplementary Figure S8. *Enl* mutation perturbs the normal hematopoietic hierarchy and leads to  
95 abnormal expansion of myeloid progenitors in mice in the leukemic phase.

96 Supplementary Figure S9. *Enl* mutation does not lead to the expansion of myeloid progenitors in mice  
97 in the pre-leukemic phase.

98 Supplementary Figure S10. *Enl* mutation promotes self-renewal properties of HSPCs.

99 Supplementary Figure S11. *Enl* mutation-induced up- and down-regulated genes are related to distinct  
100 biological functions.

101 Supplementary Figure S12. *Enl* mutation leads to a gain of myeloid differentiation signatures in HSPCs.

102 Supplementary Figure S13. Mutant ENL-induced H3K27ac signals correlate with upregulation of  
103 development and inflammation associated transcriptional programs.

104 Supplementary Figure S14. HSPCs gain H3K27me3 during differentiation in wildtype mice.

105 Supplementary Figure S15. Differentiation-associated gain of H3K27me3 is impaired in *Enl*-mutated  
106 hematopoietic cells.

107 Supplementary Figure S16. ENL mutants form condensate at key target genes and increase gene  
108 expression in HSPCs.

109 Supplementary Figure S17. Condensate formation property correlates with mutant *ENL*'s oncogenic  
110 function in human CD34<sup>+</sup> HSPCs.

111 Supplementary Figure S18. Expression levels of different FLAG-*ENL* transgenes in LSK cells.

112 Supplementary Figure S19. Condensate formation property correlates with mutant ENL's oncogenic  
113 function in GMP cells.

114 Supplementary Figure S20. Disrupting condensate formation by the H116P mutation reduces ENL-T1-  
115 induced increases in chromatin occupancy of FLAG-*ENL*, H3K27ac, and p300 at a subset of target genes.

116 Supplementary Figure S21. Impact of mutant ENL on leukemia development and condensate formation.

117 Supplementary Figure S22. Small molecule inhibition of the acetyl-binding activity of mutant ENL  
118 suppresses chromatin function and *Hoxa* cluster gene activation in LSK cells.

119 Supplementary Figure S23. Small molecule inhibition of the acetyl-binding activity of mutant ENL  
120 impairs its chromatin and transcriptional function in HSPCs.

121 Supplementary Figure S24. Small molecule inhibition of the acetyl-binding activity of mutant ENL  
122 inhibits its impact on the self-renewal property in HSPCs.

123

## 124 **Supplementary Tables**

125 Supplementary Table S1. Genes differentially expressed between *Enl*-T1 and *Enl*-WT LSK cells.

126 Supplementary Table S2. Genes differentially expressed between *Enl*-T1 and *Enl*-WT GMP cells.

127 Supplementary Table S3. Genes differentially expressed between *Enl*-T1 and *Enl*-WT L-GMP cells.

128 Supplementary Table S4. Genes differentially expressed between *Enl*-T1 and *Enl*-WT cKit<sup>+</sup>Mac1<sup>+</sup> cells.

129 Supplementary Table S5. Genes differentially expressed between *Enl*-T1 and *Enl*-WT cKit<sup>-</sup>Mac1<sup>+</sup> cells.

130 Supplementary Table S6. Shared *Enl*-T1 up-regulated DEGs in LSK, GMP, and L-GMP cells.

131 Supplementary Table S7. Expression of *Hoxa* genes in *Enl*-WT and *Enl*-T1 hematopoietic populations.

132 Supplementary Table S8. GSEA gene sets used in Supplementary Figure S12.

133 Supplementary Table S9. GSVA score of patients from TARGET-AML database.

134 Supplementary Table S10. H3K27ac peaks in all hematopoietic populations.

135 Supplementary Table S11. H3K27ac differential regions of ENL-T1 versus ENL-WT in LSK cells.

136 Supplementary Table S12. H3K27ac differential regions of ENL-T1 versus ENL-WT in GMP cells.

137 Supplementary Table S13. H3K27ac differential regions of ENL-T1 versus ENL-WT in L-GMP cells.

138 Supplementary Table S14. H3K27ac differential regions of ENL-T1 versus ENL-WT in cKit<sup>+</sup>Mac1<sup>+</sup>  
139 cells.

140 Supplementary Table S15. H3K27ac differential regions of ENL-T1 versus ENL-WT in cKit<sup>+</sup>Mac1<sup>+</sup>  
141 cells.

142 Supplementary Table S16. T1-UP DEGs associated with H3K27ac T1 gained DRs in all hematopoietic  
143 populations.

144 Supplementary Table S17. H3K27ac T1 gained differential regions associated with T1-UP DEGs in all  
145 hematopoietic populations.

146 Supplementary Table S18. p300 ChIP-seq normalized signal at T1 gained H3K27ac differential regions  
147 in *Enl*-WT and *Enl*-T1 GMP, L-GMP cells.

148 Supplementary Table S19. T1 gained H3K27ac differential regions with both p300 UP and associated  
149 gene expression UP in *Enl*-T1 cells for GMP and L-GMP.

150 Supplementary Table S20. T1 gained H3K27ac differential regions with p300 UP and associated gene  
151 expression UP in *Enl*-T1 cells for L-GMP under A-485 treatment.

152 Supplementary Table S21. H3K27me3 peaks in wildtype hematopoietic populations.

153 Supplementary Table S22. Hematopoietic differentiation associated-H3K27me3 peaks.

154 Supplementary Table S23. H3K27me3 peaks in all hematopoietic populations.

155 Supplementary Table S24. H3K27me3 differential regions of ENL-T1 versus ENL-WT in LSK cells.

156 Supplementary Table S25. H3K27me3 differential regions of ENL-T1 versus ENL-WT in GMP cells.

157 Supplementary Table S26. H3K27me3 differential regions of ENL-T1 versus ENL-WT in L-GMP cells.

158 Supplementary Table S27. H3K27me3 differential regions of ENL-T1 versus ENL-WT in cKit<sup>+</sup>Mac1<sup>+</sup>  
159 cells.

160 Supplementary Table S28. H3K27me3 differential regions of ENL-T1 versus ENL-WT in cKit<sup>+</sup>Mac1<sup>+</sup>  
161 cells.

162 Supplementary Table S29. T1-UP DEGs associated with H3K27me3 lost differential regions in all  
163 hematopoietic populations.

164 Supplementary Table S30. Group1 and group2 gene list in cKit<sup>+</sup>Mac1<sup>+</sup> and cKit<sup>-</sup>Mac1<sup>+</sup> cells.

165 Supplementary Table S31. FLAG-ENL peaks in LSK cells expressing the indicated FLAG-ENL  
166 transgenes.

167 Supplementary Table S32. FLAG-ENL gained regions of T1 versus WT in LSK cells expressing the  
168 indicated FLAG-ENL transgenes.

169 Supplementary Table S33. H3K27ac T1 gained differential regions associated with T1 gained FLAG-  
170 ENL DRs in LSK cells expressing the indicated FLAG-ENL transgenes.

171 Supplementary Table S34. Genes differentially expressed between *Enl*-T1-DMSO and *Enl*-WT-DMSO  
172 LSK cells.

173 Supplementary Table S35. Genes differentially expressed between *Enl*-T1-DMSO and *Enl*-WT-DMSO  
174 in GMP cells.

175 Supplementary Table S36. Expression of Hoxa genes under *Enl*-WT-DMSO, *Enl*-T1-DMSO and *Enl*-  
176 T1-TDI conditions in LSK and GMP cells.

177 Supplementary Table S37. Oligos used in this study.

178 Supplementary Table S38. Antibodies used in this study.

179

180 **Supplementary Figure S1**

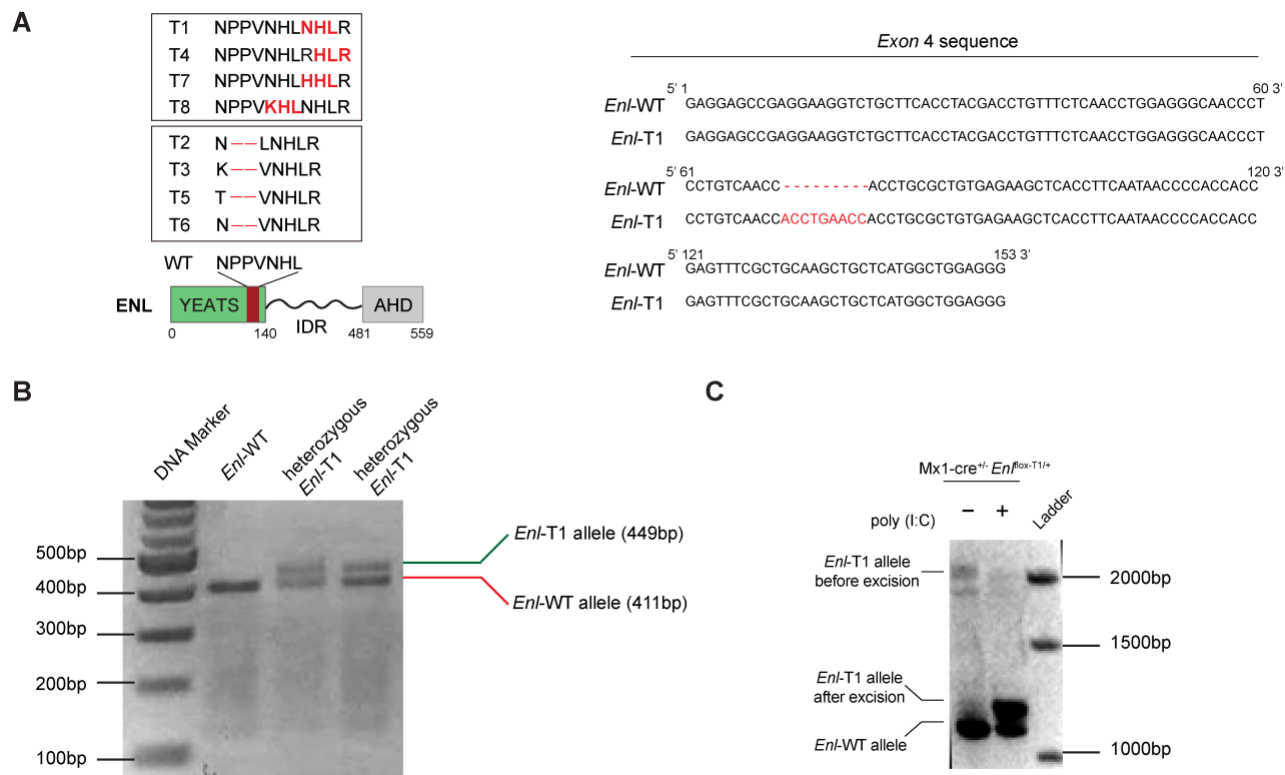

181

182 **Supplementary Figure S1. Generation of a conditional knock-in mouse model for the *Enl*-T1**  
 183 **mutation.** **A**, Left, the domain structure of the ENL protein and protein sequence differences for ENL  
 184 WT and mutants (T1-T8). Right, the DNA sequence of WT or T1 mutation-containing exon 4 in the *Enl*  
 185 gene. The insertion is highlighted in red. IDR, intrinsically disordered region; AHD, ANC1 homologue  
 186 domain. **B**, Genotyping PCR showing DNA bands for *Enl*-WT and *Enl*-T1 alleles before Cre-mediated  
 187 recombination. Primers F1/R1 shown in Figure 1A were used. **C**, PCR analysis showing the  
 188 recombination efficiency of the *Enl*-T1 allele in *Enl*-T1 mice before and after poly (I:C) treatment.  
 189 Primers F2/R2 shown in Figure 1A were used to identify the WT and T1 alleles in both before and after  
 190 cre-mediated recombination conditions.

191

192

193 **Supplementary Figure S2**

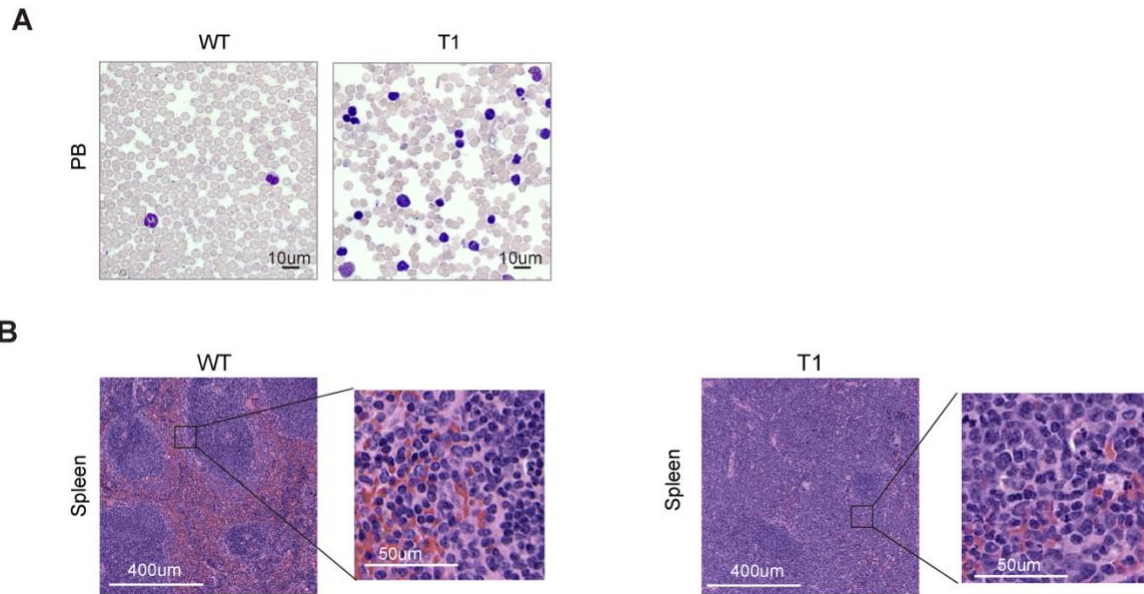

194

**Supplementary Figure S2. Impact of *Enl* mutation on the peripheral blood and spleen. A,** Wright–Giemsa-stained smear of PB harvested from *Enl*-T1 mice and age-matched control mice. PB, peripheral blood. Scale bar, 10 μm. **B,** Representative hematoxylin and eosin (H&E) staining of spleen harvested from *Enl*-WT or T1 mice. Scale bar, 400 μm (left, zoomed out); 50 μm (right, zoomed in).

195



196 **Supplementary Figure S3**

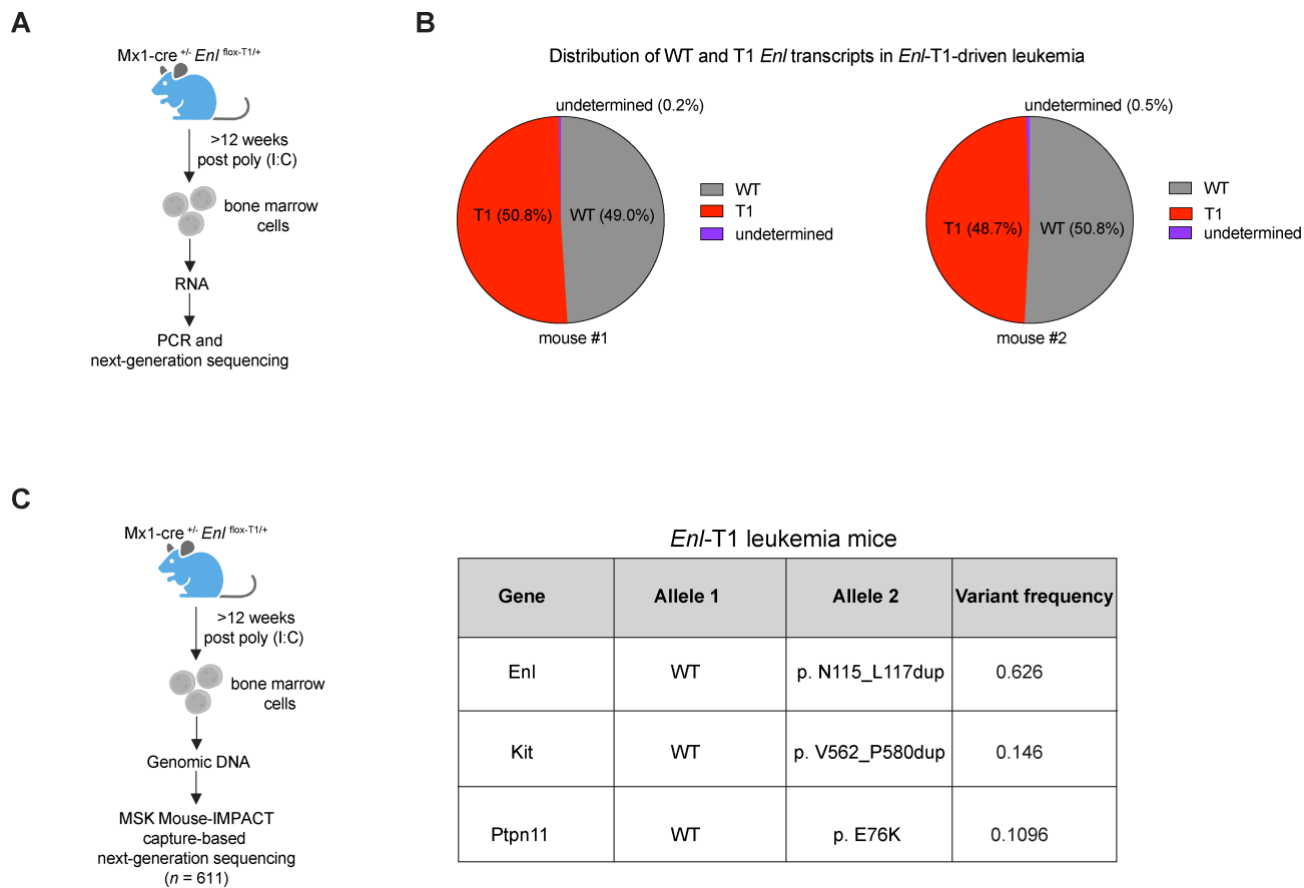

**Supplementary Figure S3. Characterization of *Enl*-T1 allele expression and concurrent mutations in heterozygous knock-in *Enl*-T1 mouse model.** **A**, Schematic workflow of *Enl*-WT and T1 transcripts analysis for *Enl*-T1 bone marrow cells. **B**, Pie charts showing the distribution of *Enl*-WT and T1 transcripts in *Enl*-T1-driven leukemia. *Enl*-WT allele (grey), *Enl*-T1 allele (red), undetermined allele (purple). **C**, Workflow (left) and detected mutations (right) in *Enl*-T1-driven leukemia.

197  
198

Tamoxifen induced UBC-cre-ERT2 mouse model

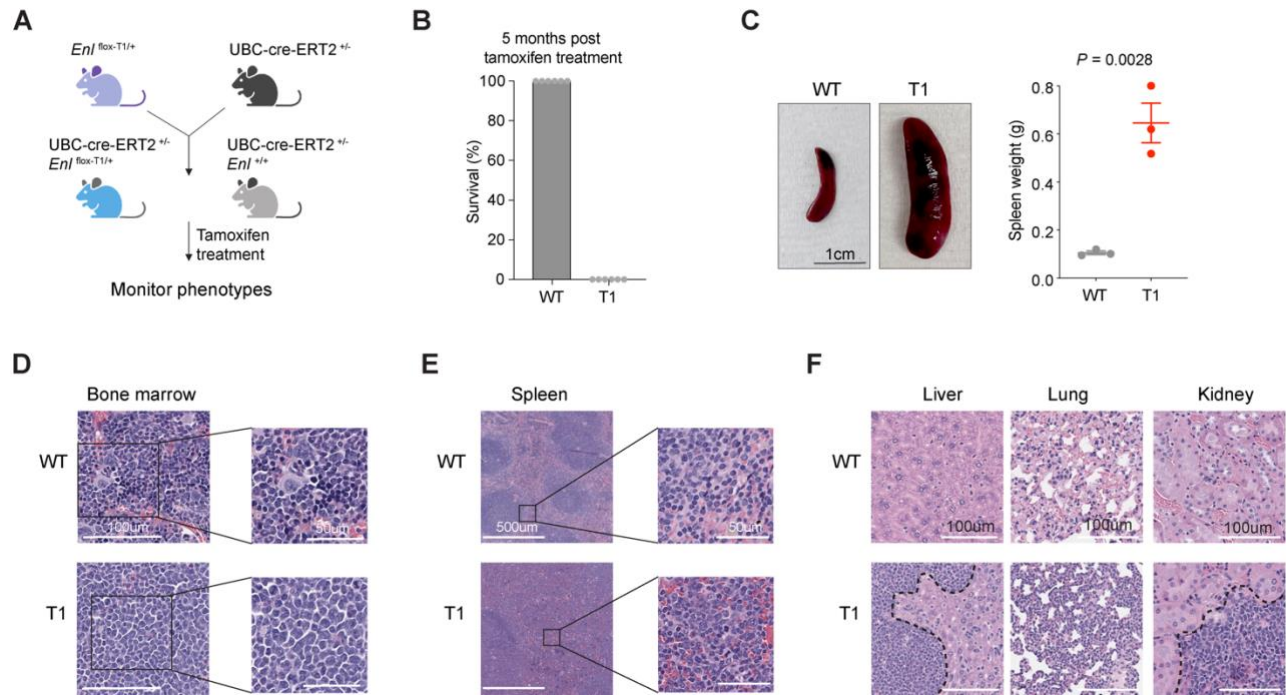

200

**Supplementary Figure S4. UBC-cre-ERT2/*Enl*<sup>flox-T1/+</sup> mice develop aggressive acute leukemia following tamoxifen treatment.** **A**, Breeding strategies to obtain UBC-cre-ERT2/*Enl*<sup>flox-T1/+</sup> mice for experiments. **B**, Quantification plot showing survival percentage of *Enl*-WT ( $n = 5$ ) or *Enl*-T1 ( $n = 5$ ) mice post tamoxifen treatment for 5 months. WT, UBC-cre-ERT2/*Enl*<sup>+/+</sup>; T1, UBC-cre-ERT2/*Enl*<sup>flox-T1/+</sup>. **C**, Representative images (left) and weight quantification (right) of spleen harvested from *Enl*-WT or T1 mice. Scale bar, 1 cm; Bars represent the median ( $n = 3$ ).  $P$  value using unpaired, two-tailed Student's  $t$ -test. **D**, **E**, Representative hematoxylin and eosin (H&E) staining of bone marrow (**D**) and spleen (**E**) harvested from *Enl*-WT or T1 mice. Scale bar for bone marrow, 100  $\mu$ m (left, zoomed out); 50  $\mu$ m (right, zoomed in). Scale bar for spleen, 500  $\mu$ m (left, zoomed out); 50  $\mu$ m (right, zoomed in). **F**, Representative H&E staining of liver (left), lung (middle), kidney (right) harvested from *Enl*-WT or T1 mice. Scale bar, 100  $\mu$ m.

201

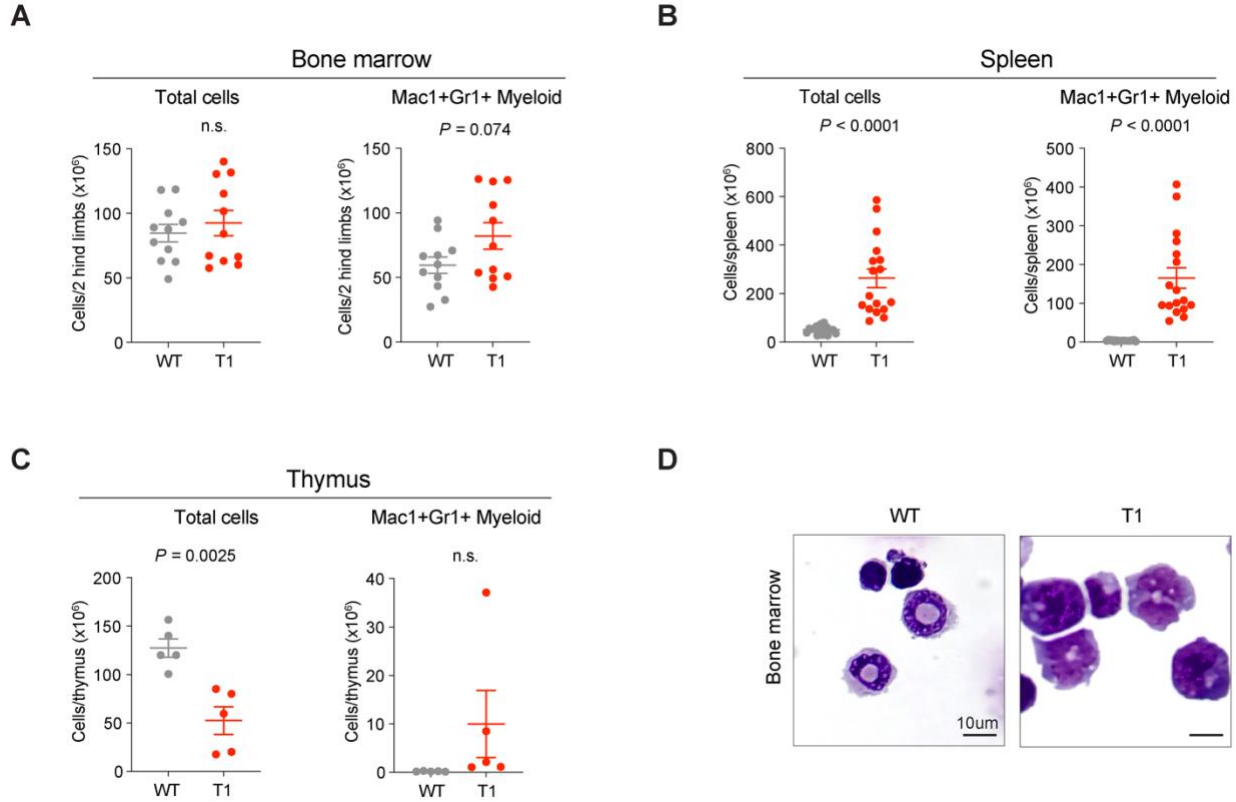

**Supplementary Figure S5. *Enl* mutation leads to expansion of myeloid cells in mice in the leukemic phase.** **A-C**, Number of total cells (left) and Mac1<sup>+</sup>Gr1<sup>+</sup> myeloid cells (right) in bone marrow (**A**), spleen (**B**), and thymus (**C**) samples harvested from *Enl*-T1 leukemic mice and age-matched control mice. Bars represent the median (bone marrow,  $n = 11$ ; spleen,  $n = 17$ ; thymus,  $n = 5$ ).  $P$  value using unpaired, two-tailed Student's  $t$ -test. n.s., not significant. **D**, Wright-Giemsa-stained smear of bone marrow harvested from *Enl*-T1 leukemic mice and age-matched control mice. Scale bar, 10  $\mu\text{m}$ .

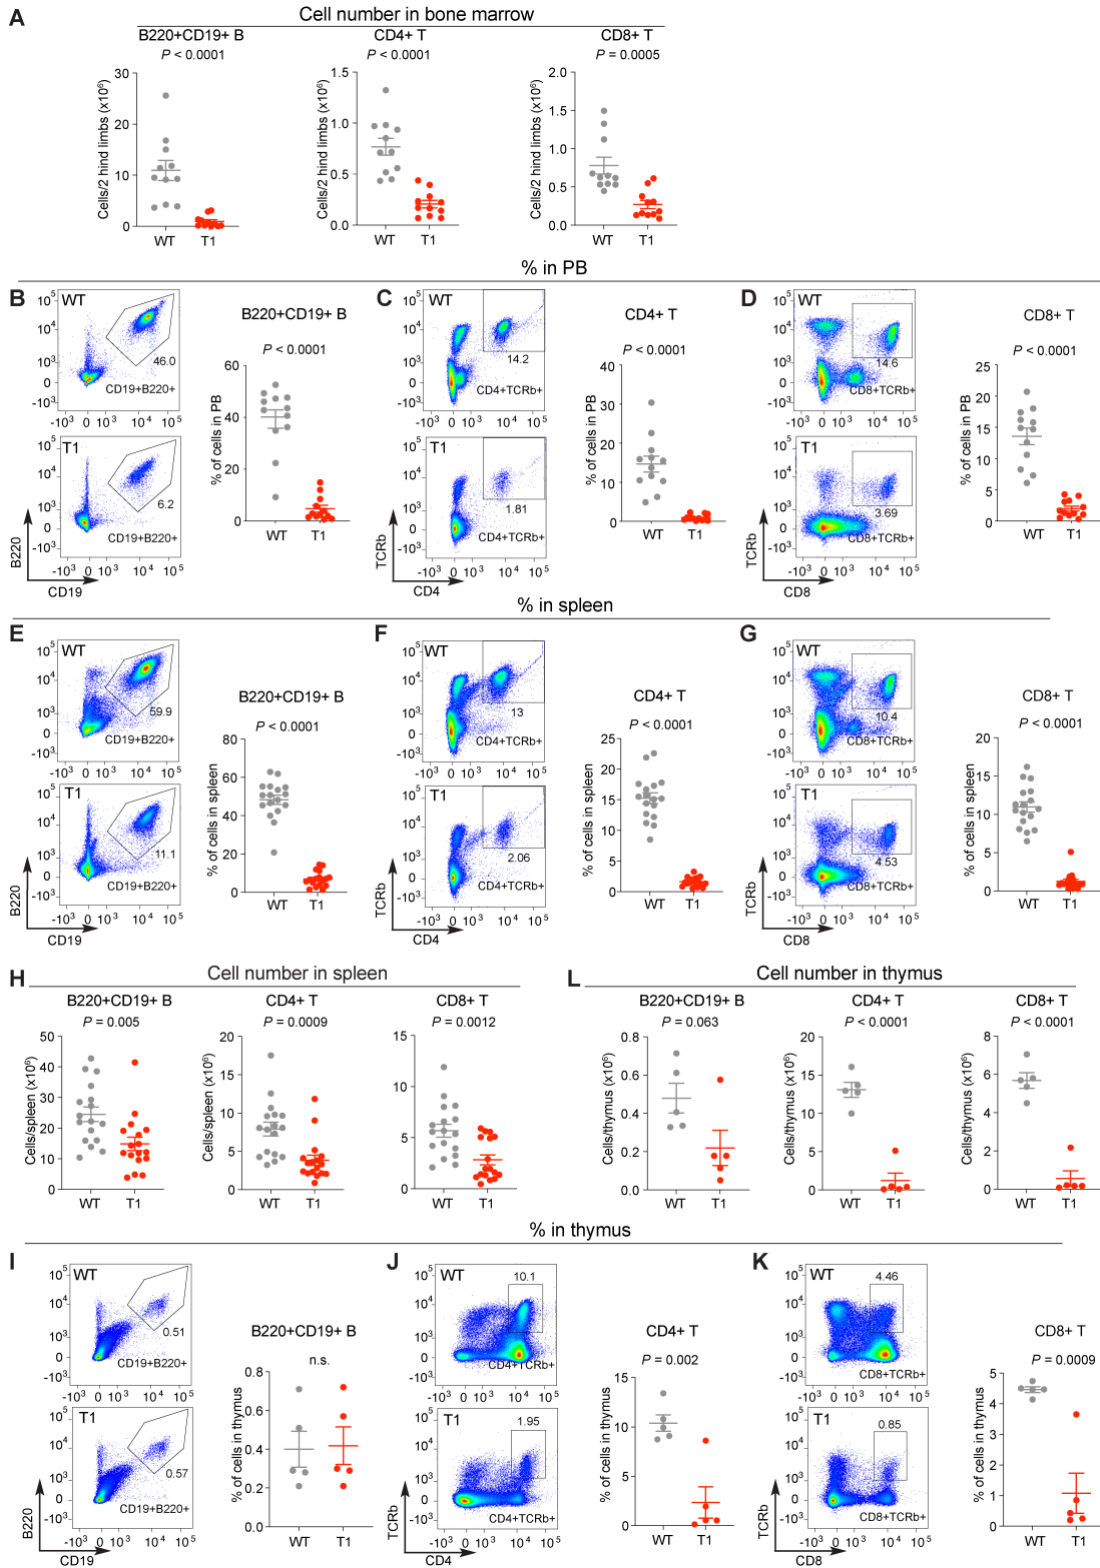

**Supplementary Figure S6. *Enl* mutation leads to the decrease of B220<sup>+</sup>CD19<sup>+</sup> B, CD4<sup>+</sup>T, CD8<sup>+</sup> T cells in mice in the leukemic phase.** **A**, Number of B220<sup>+</sup>CD19<sup>+</sup> B (left), CD4<sup>+</sup>T (middle), CD8<sup>+</sup> T (right) cells in bone marrow samples harvested from *Enl*-T1 leukemic mice and age-matched control mice. *n* = 11. **B-D**, Representative flow cytometric plots and percentage of B220<sup>+</sup>CD19<sup>+</sup> B (**B**), CD4<sup>+</sup>T (**C**), CD8<sup>+</sup> T (**D**) cells in PB samples harvested from *Enl*-T1 leukemic mice and age-matched control mice. *n* = 12. **E-G**, Representative flow cytometric plots and the percentage of B220<sup>+</sup>CD19<sup>+</sup> B (**E**), CD4<sup>+</sup>T (**F**), CD8<sup>+</sup> T (**G**) cells in spleen samples harvested from *Enl*-T1 leukemic mice and age-matched control mice. *n* = 17. **H**, Number of B220<sup>+</sup>CD19<sup>+</sup> B (left), CD4<sup>+</sup>T (middle), CD8<sup>+</sup> T (right) cells in spleen samples harvested from *Enl*-T1 leukemic mice and age-matched control mice. *n* = 17. **I-K**, Representative flow cytometric plots and the percentage of B220<sup>+</sup>CD19<sup>+</sup> B (**I**), CD4<sup>+</sup>T (**J**), CD8<sup>+</sup> T (**K**) cells in thymus samples harvested from *Enl*-T1 leukemic mice and age-matched control mice. *n* = 5. **L**, Number of B220<sup>+</sup>CD19<sup>+</sup> B (left), CD4<sup>+</sup>T (middle), CD8<sup>+</sup> T (right) cells in thymus samples harvested from *Enl*-T1 leukemic mice and age-matched control mice. *n* = 5. **A-L**, Bars represent the median; *P* value using unpaired, two-tailed Student's *t*-test. n.s., not significant.

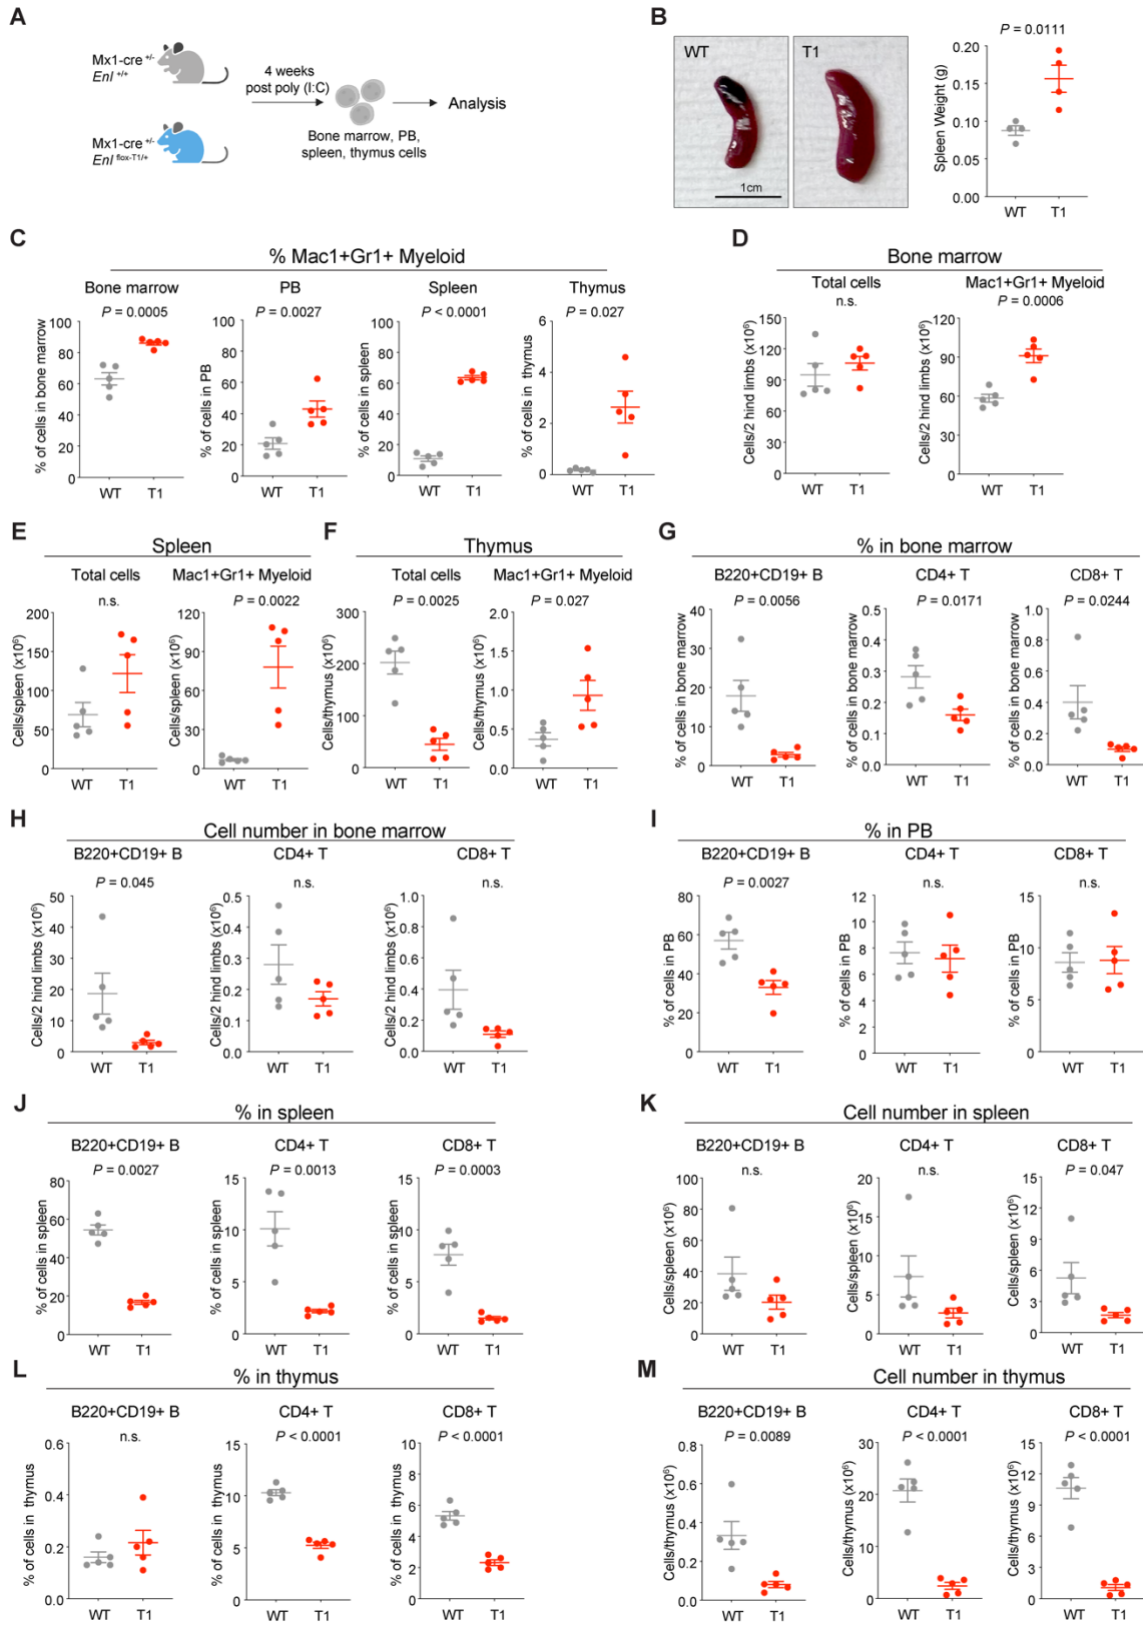

**Supplementary Figure S7. Impact of the *Enl* mutation on the bone marrow, peripheral blood, spleen, and thymus in mice in the pre-leukemic phase.** **A**, Schematic of experimental workflow of *Enl*-T1 pre-leukemic mice and age-matched control mice (shown in **B-M**). **B**, Representative images (left) and weight quantification (right) of spleen. Scale bar, 1 cm;  $n = 4$ . **C**, Percentage of Mac1<sup>+</sup>Gr1<sup>+</sup> myeloid cell population in the bone marrow (left), PB (center left), spleen (center right), and thymus (right) samples.  $n = 5$ . **D-F**, Number of total cells (left) and Mac1<sup>+</sup>Gr1<sup>+</sup> myeloid cells (right) in bone marrow (**D**), spleen (**E**), and thymus (**F**) samples.  $n = 5$ . **G, H**, Percentage (**G**) and number (**H**) of B220<sup>+</sup>CD19<sup>+</sup> B (left), CD4<sup>+</sup>T (middle), CD8<sup>+</sup> T (right) cells in bone marrow samples.  $n = 5$ . **I**, Percentage of B220<sup>+</sup>CD19<sup>+</sup> B (left), CD4<sup>+</sup>T (middle), CD8<sup>+</sup> T (right) cells in peripheral blood samples.  $n = 5$ . **J, K**, Percentage (**J**) and number (**K**) of B220<sup>+</sup>CD19<sup>+</sup> B (left), CD4<sup>+</sup>T (middle), CD8<sup>+</sup> T (right) cells in spleen samples.  $n = 5$ . **L, M**, Percentage (**L**) and number (**M**) of B220<sup>+</sup>CD19<sup>+</sup> B (left), CD4<sup>+</sup>T (middle), CD8<sup>+</sup> T (right) cells in thymus samples.  $n = 5$ . **B-M**, Bars represent the median;  $P$  value using unpaired, two-tailed Student's  $t$ -test. n.s., not significant.

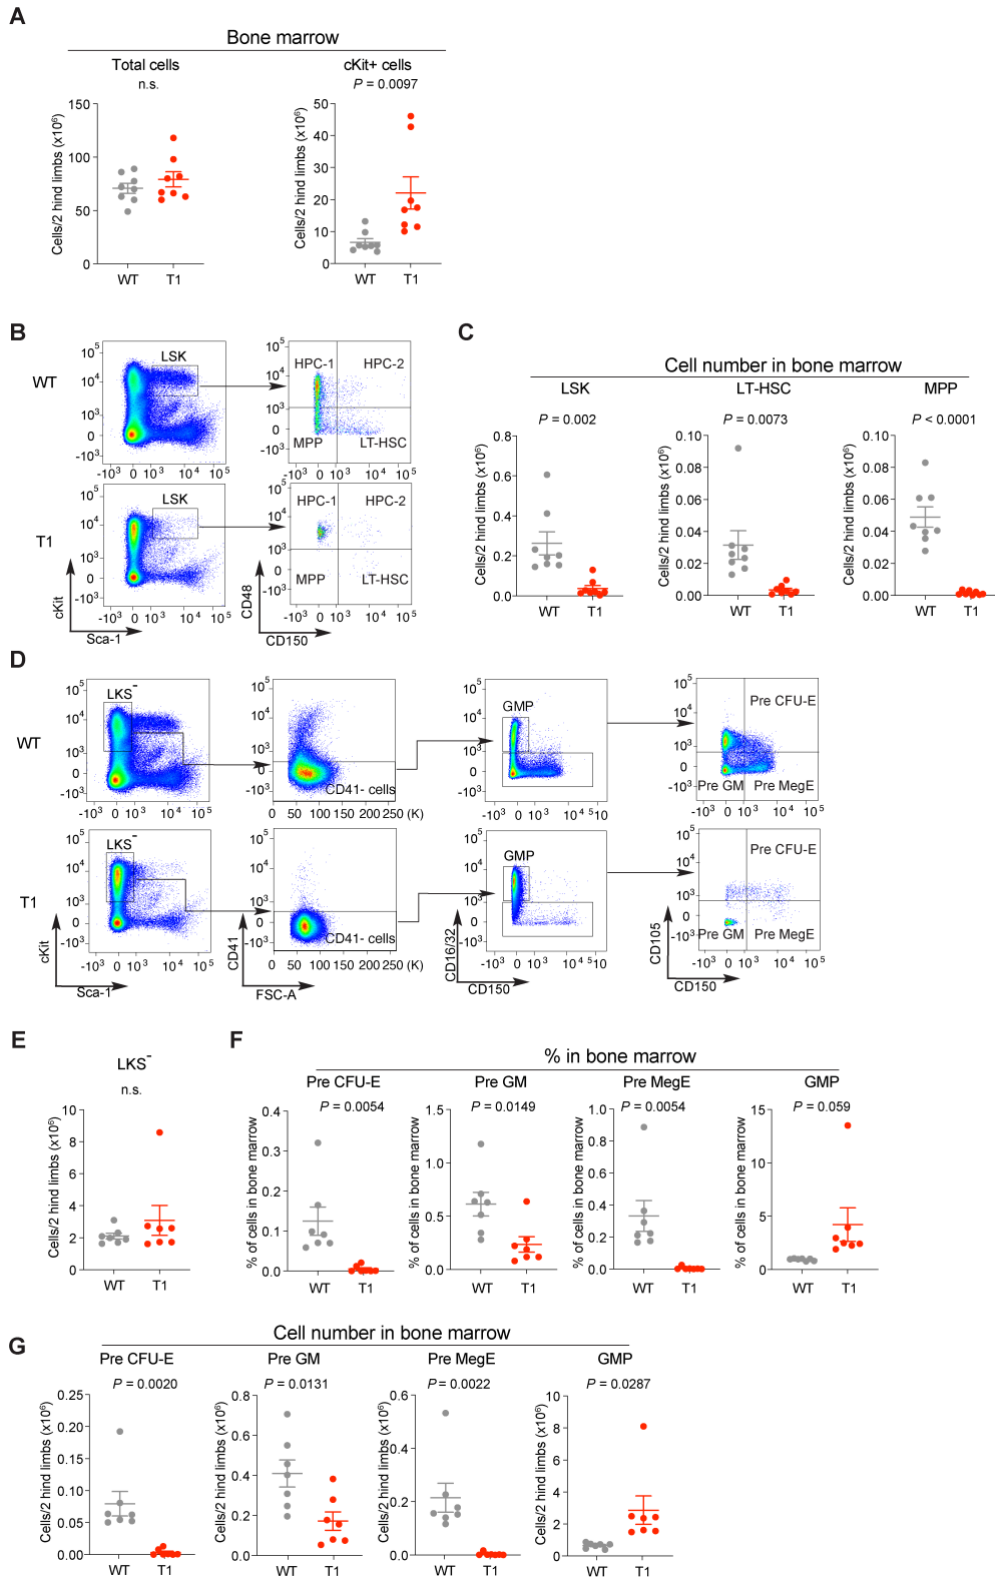



**Supplementary Figure S8. *Enl* mutation perturbs the normal hematopoietic hierarchy and leads to abnormal expansion of myeloid progenitors in mice in the leukemic phase.** **A**, Number of total cells (left) and cKit<sup>+</sup> cells (right) in bone marrow samples (see workflow in **Fig.2B**).  $n = 8$ . **B, C**, Representative flow cytometric plots (**B**) and number (**C**) of LSK, LT-HSC, and MPP cells in bone marrow (see workflow in **Fig.2B**).  $n = 8$ . **D**, Representative flow cytometric plots of LKS<sup>-</sup>, GMP, Pre CFU-E, Pre GM, and Pre MegE cells in bone marrow samples (see workflow in **Fig.2B**). **E**, Number of LKS<sup>-</sup> cells in bone marrow samples (see workflow in **Fig.2B**).  $n = 7$ . **F, G**, Percentage (**F**) and number (**G**) of Pre CFU-E (left), Pre GM (center left), Pre MegE (center right), and GMP (right) cells in bone marrow (see workflow in **Fig.2B**).  $n = 7$ . **A, C, E-G**, Bars represent the median;  $P$  value using unpaired, two-tailed Student's  $t$ -test. n.s., not significant.

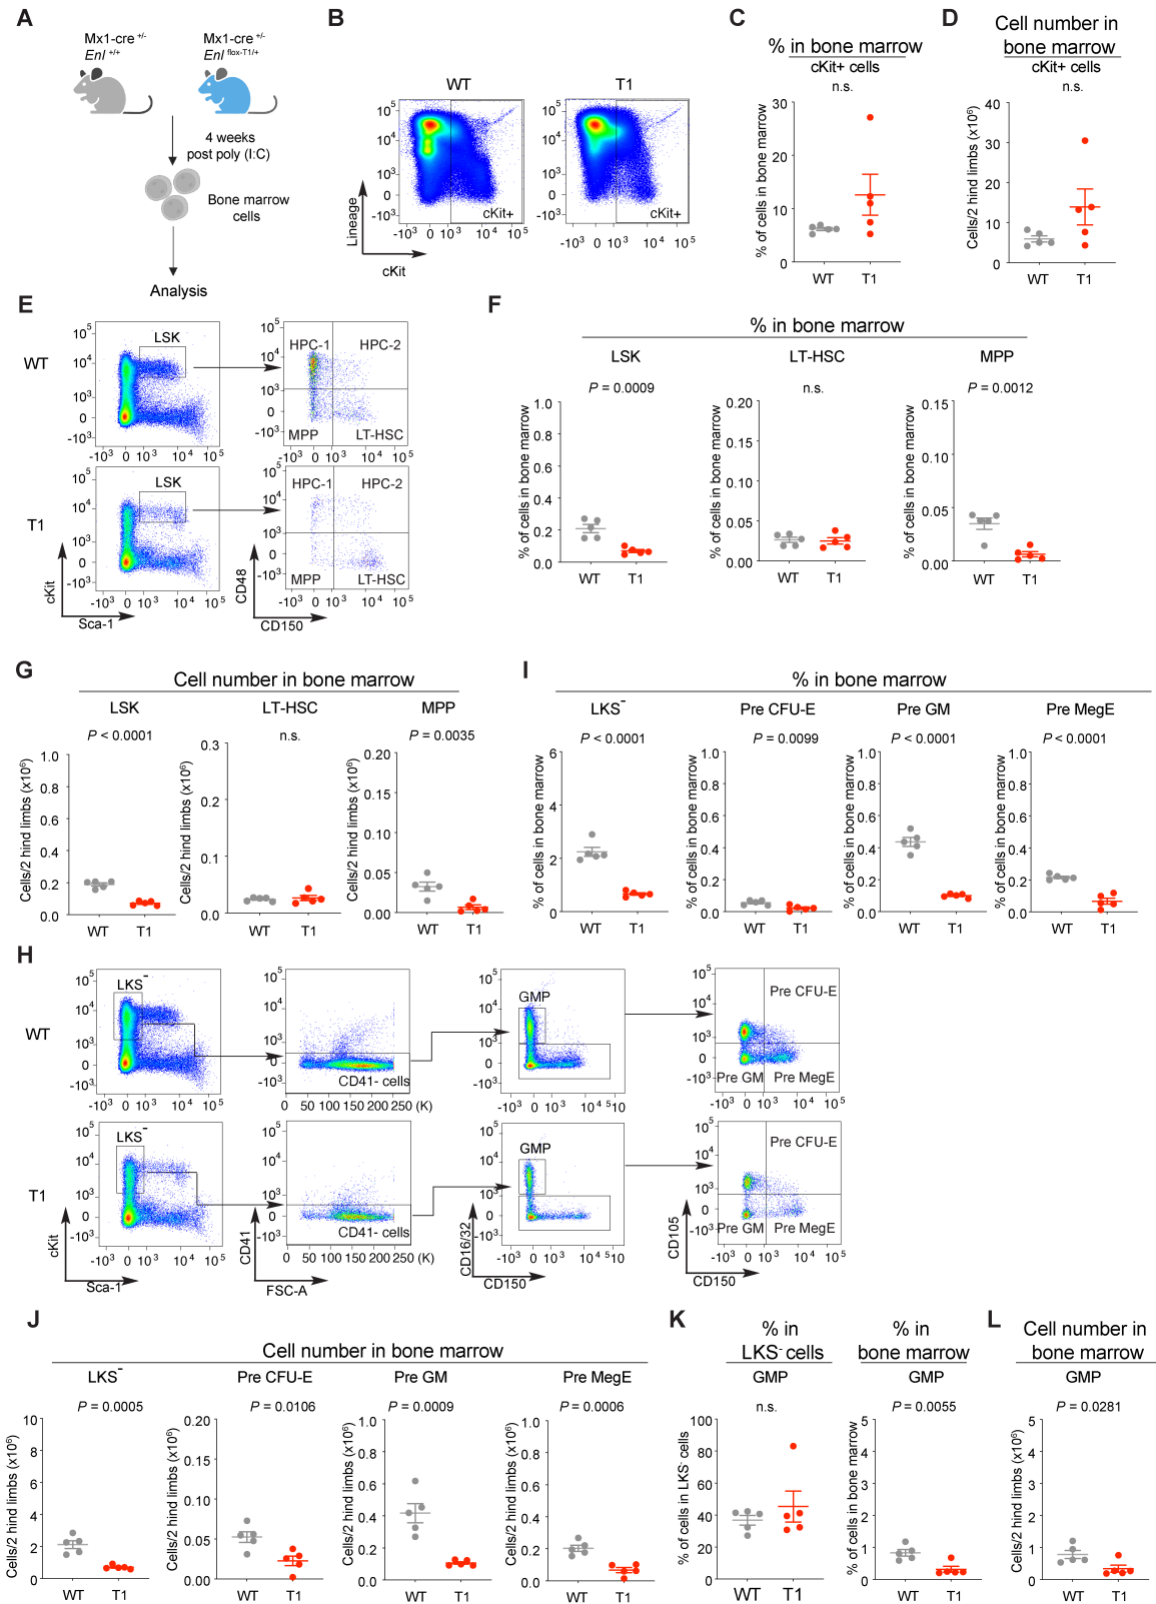

**Supplementary Figure S9. *Enl* mutation does not lead to the expansion of myeloid progenitors in mice in the pre-leukemic phase.** **A**, Schematic workflow of flow cytometric analysis for bone marrow cells from *Enl*-T1 pre-leukemic mice and age-matched control mice (shown in **B-K**). **B-D**, Representative flow cytometric plots (**B**), percentage (**C**), and number (**D**) of cKit<sup>+</sup> cells in bone marrow samples. *n* = 5. **E-G**, Representative flow cytometric plots (**E**), percentage (**F**), and number (**G**) of LSK (left), LT-HSC (middle), and MPP (right) cells in bone marrow samples. *n* = 5. **H**, Representative flow cytometric plots of LKS<sup>-</sup>, GMP, Pre CFU-E, Pre GM, and Pre MegE cells in bone marrow samples. **I, J**, Percentage (**I**) and number (**J**) of LKS<sup>-</sup> (left), Pre CFU-E (center left), Pre GM (center right), Pre MegE (right) cells in bone marrow samples. *n* = 5. **K**, Percentage of GMP cells in LKS<sup>-</sup> population (left) or bone marrow (right) samples. *n* = 5. **L**, Number of GMP cells in bone marrow samples. *n* = 5. **C, D, F, G, I-L**, Bars represent the median; *P* value using unpaired, two-tailed Student's *t*-test. n.s., not significant.

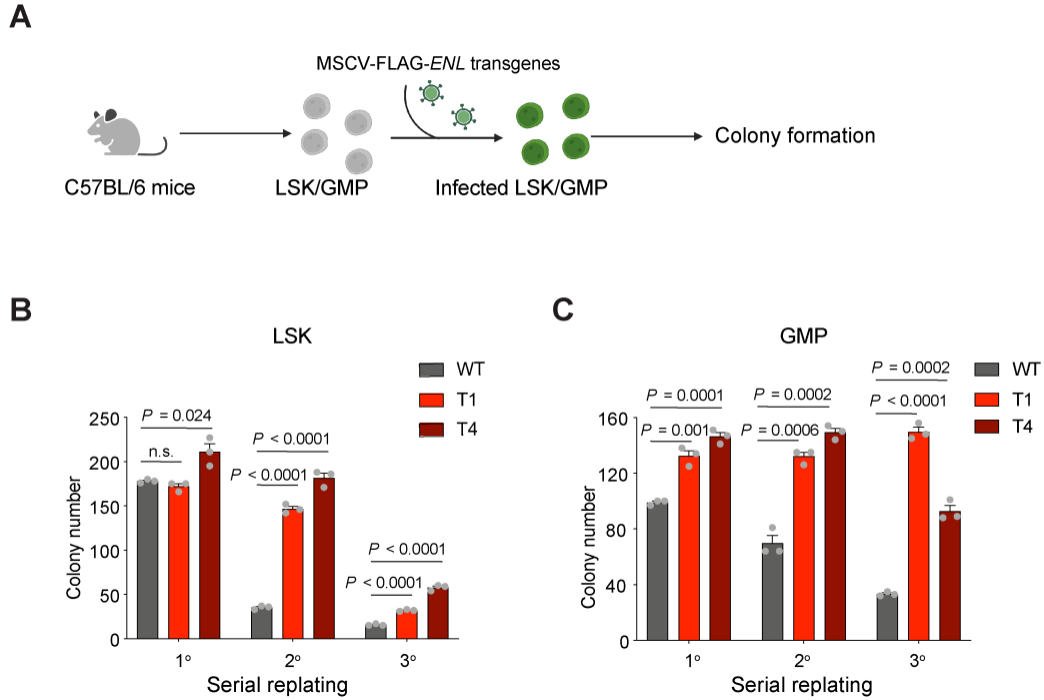

**Supplementary Figure S10. *Enl* mutation promotes self-renewal properties of HSPCs.** **A**, Schematic depiction of transduction of FLAG-GFP-tagged-*ENL* transgenes in LSK/GMP cells and subsequent colony formation assays. **B**, **C**, Quantification of colonies formed by LSK (**B**), GMP (**C**) cells expressing different FLAG-*ENL* transgenes. Error bars represent mean  $\pm$  SEM ( $n = 3$ ). *P* values using unpaired, two-tailed Student's *t*-test. n.s., not significant.

218 **Supplementary Figure S11**

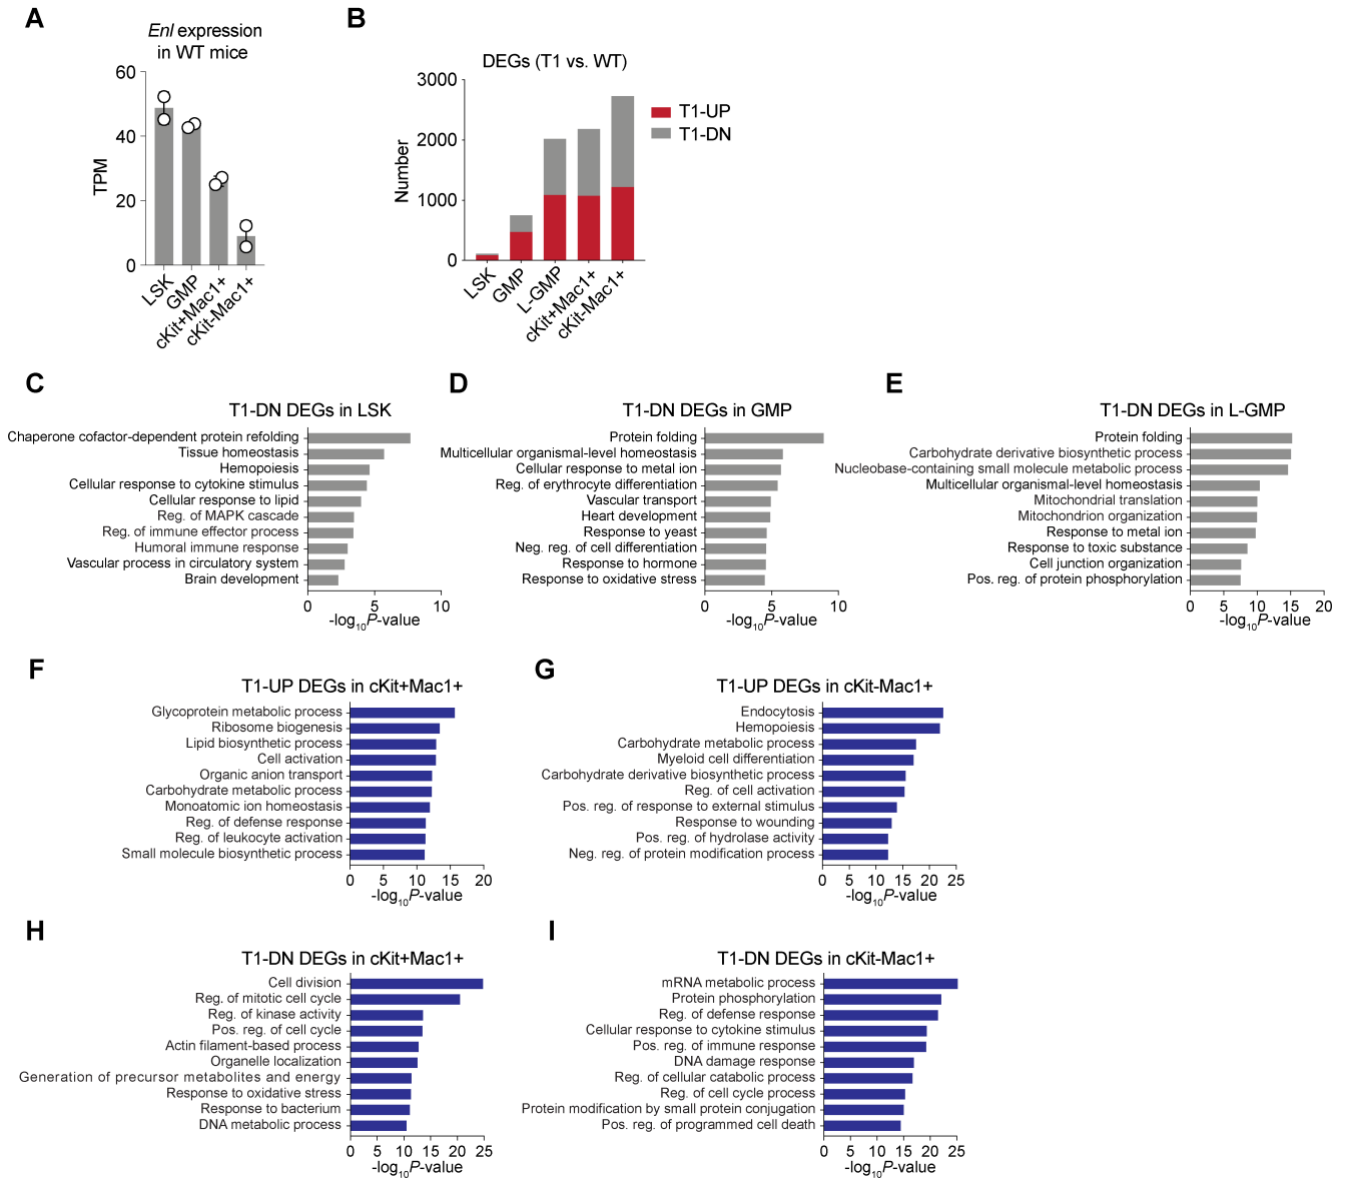

**Supplementary Figure S11. *Enl* mutation-induced up- and down-regulated genes are related to distinct biological functions.** **A**, Bar plots showing *Enl* expression in wild-type, normal hematopoietic populations. Gene expression is obtained from the RNA-seq data (see **Fig. 3A**) and normalized by transcripts per million (TPM). Dots represent different biological replicates. **B**, Stacked bar plots showing the number of *Enl*-T1-up and down-regulated genes in indicated cell populations. T1-UP, *Enl*-T1 up-regulated; T1-DN, *Enl*-T1 down-regulated; DEGs, differentially expressed genes. See Supplementary Tables S1-S5. **C-E**, Bar plots showing the GO-term analysis of T1-DN DEGs for LSK (**C**), GMP (**D**), L-GMP (**E**) cells. **F, G**, Bar plots showing the GO-term analysis of T1-UP DEGs for cKit<sup>+</sup>Mac1<sup>+</sup> (**F**) and cKit<sup>-</sup>Mac1<sup>+</sup> (**G**) cells. **H, I**, Bar plots showing the GO-term analysis of T1-DN DEGs for cKit<sup>+</sup>Mac1<sup>+</sup> (**H**) and cKit<sup>-</sup>Mac1<sup>+</sup> (**I**) cells. Pos., positive; Neg., negative; Reg., regulation.

221 **Supplementary Figure S12**

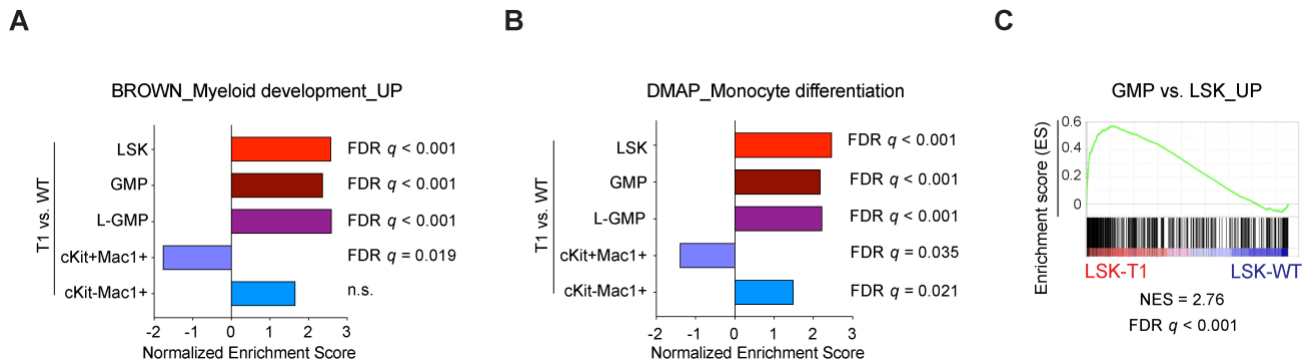

222

**Supplementary Figure S12. *Enl* mutation leads to a gain of myeloid differentiation signatures in HSPCs.** **A, B,** Normalized enrichment scores of Myeloid development\_UP (**A**) and Monocyte differentiation (**B**) gene sets derived from GSEA analysis in indicated T1 cell populations when compared with WT counterparts. See Supplementary Table S8. **C,** GSEA plots evaluating gene expression changes in *Enl*-T1 versus *Enl*-WT LSK cells with genes upregulated in GMP versus LSK. FDR, false discovery rate; NES, normalized enrichment score. See Supplementary Table S8.

223 **Supplementary Figure S13**

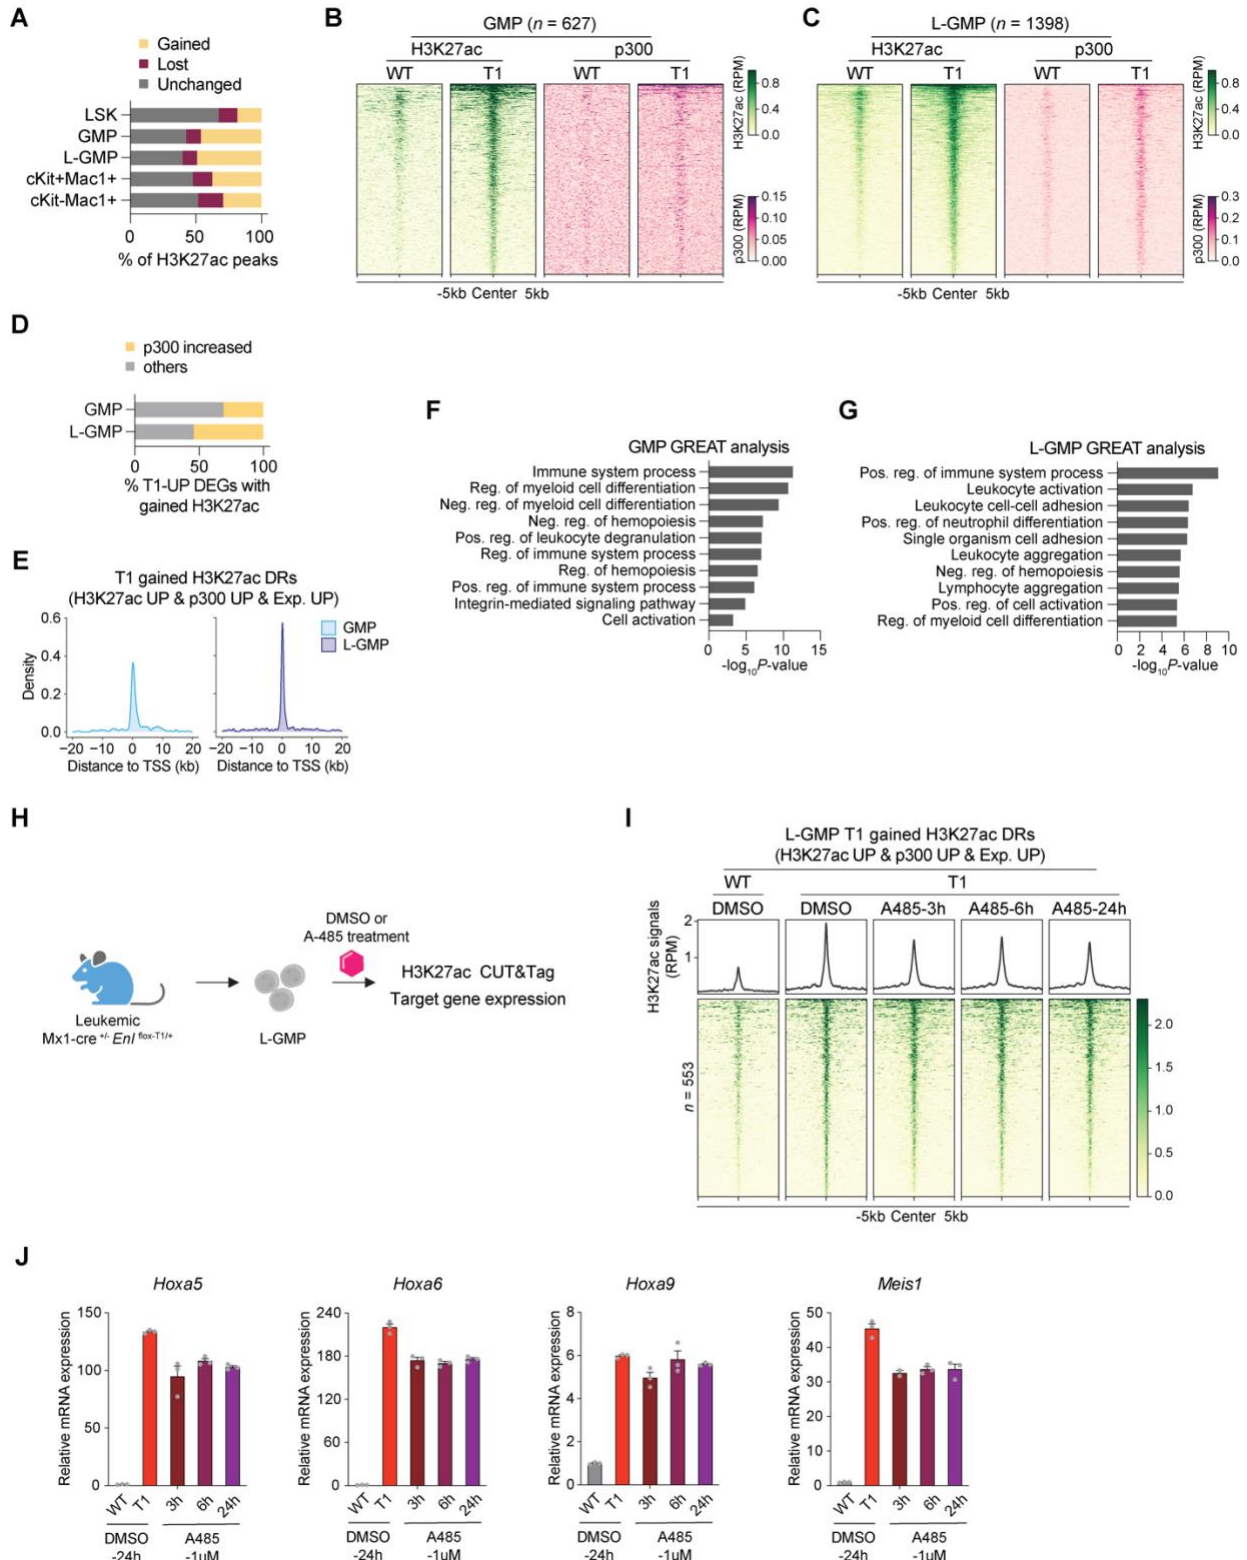

224

225



**Supplementary Figure S13. Mutant ENL-induced H3K27ac signals correlate with upregulation of development and inflammation associated transcriptional programs.** **A**, Stacked bar plots showing the percentage of T1 gained (yellow), lost (purple) and unchanged (grey) H3K27ac DRs in indicated cell populations. See Supplementary Tables S11-S15. **B, C**, Heatmap showing H3K27ac and p300 signals on T1-UP DEGs associated with gained H3K27ac DRs in GMP (**B**) and L-GMP (**C**) from *Enl*-WT or T1 mice. The CUT&Tag or ChIP-seq signals are normalized by RPM. See Supplementary Table S17. **D**, Stacked bar plots indicating the percentage of T1-UP DEGs with gained H3K27ac that also exhibited increased p300 occupancy (fold-change > 1.5). See Supplementary Table S18. **E**, Histogram showing that regions with an increase in p300 occupancy and H3K27ac signals and associated with T1-UP DEGs are located close to the TSS in GMP (left) and L-GMP (right). Exp., expression. See Supplementary Table S19. **F and G**, GREAT analysis of regions with an increase in p300 occupancy and H3K27ac signals and associated with T1-UP DEGs (identified in (D)) in GMP (**F**) and L-GMP (**G**). Pos., positive; Neg., negative; Reg., regulation. **H**, Schematic showing *ex vivo* treatment of L-GMP cells from *Enl*-T1 mice and subsequent experiments (shown in **I, J**). **I**, Average occupancies (top) and heatmap (bottom) of H3K27ac at genomic regions that exhibit T1-induced increases in H3K27ac and p300 and are associated with T1-UP DEGs in GMP (WT) or L-GMP (T1) cells treated with DMSO or A-485 (1  $\mu$ M) for 24 hours. The CUT&Tag signals are normalized by RPM. See Supplementary Table S20. **J**, RT-qPCR analysis showing mRNA expression of *Hoxa5/6/9*, *Meis1* in GMP (WT) or L-GMP (T1) cells under indicated treatment conditions. Error bars represent mean  $\pm$  SEM ( $n = 3$ ).

227 **Supplementary Figure S14**

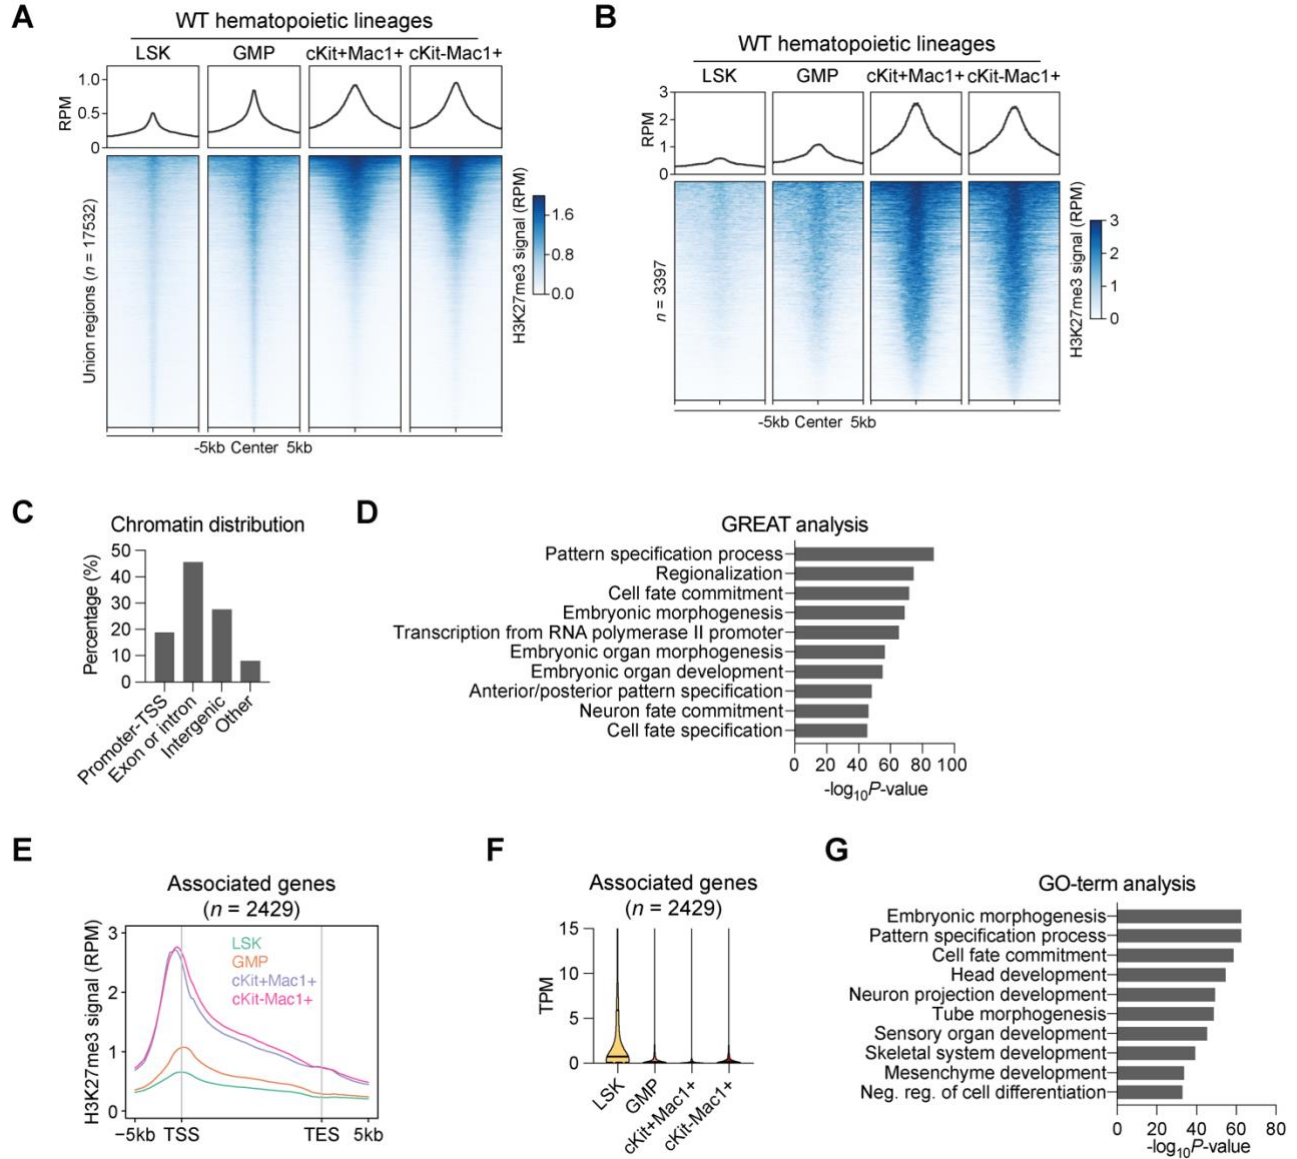

228

229

**Supplementary Figure S14. HSPCs gain H3K27me3 during differentiation in wildtype mice. A,** Average occupancies (top) and heatmap (bottom) of H3K27me3 signals showing dynamic changes of H3K27me3 during normal myeloid differentiation in wild-type mice. The union H3K27me3 peaks of normal LSK, GMP, cKit<sup>+</sup>Mac1<sup>+</sup> and cKit<sup>+</sup>Mac1<sup>+</sup> cells are used in both plots. See Supplementary Table S21. **B,** Average occupancies (top) and heatmap (bottom) of hematopoietic differentiation associated-H3K27me3 signals in LSK, GMP, cKit<sup>+</sup>Mac1<sup>+</sup>, and cKit<sup>+</sup>Mac1<sup>+</sup> cells are defined by the following strategy. Among the union H3K27me3 peaks in (A), those exhibiting higher H3K27me3 signal in GMP compared with LSK cells, as well as higher H3K27me3 signal in cKit<sup>+</sup>Mac1<sup>+</sup> and cKit<sup>+</sup>Mac1<sup>+</sup> cells compared with GMP cells (fold-change > 1.5), were selected. These peaks were further filtered by their expression in both cKit<sup>+</sup>Mac1<sup>+</sup> and cKit<sup>+</sup>Mac1<sup>+</sup> subsets (RPM>1). See Supplementary Table S22. **C,** Bar plots showing the chromatin distribution of H3K27me3 DRs identified in (B). **D,** Bar plots showing the GREAT analysis of H3K27me3 DRs (identified in (B)). **E,** Average occupancies of H3K27me3 at H3K27me3 DRs (identified in (B)) associated genes in LSK, GMP, cKit<sup>+</sup>Mac1<sup>+</sup> and cKit<sup>+</sup>Mac1<sup>+</sup> cells. *n* = 2429; TSS, transcription start site; TES, transcription end site. **F,** Violin plots showing the gene expression of H3K27me3 DRs (identified in (B)) associated genes in LSK, GMP, cKit<sup>+</sup>Mac1<sup>+</sup> and cKit<sup>+</sup>Mac1<sup>+</sup> cells. Gene expression is obtained from the RNA-seq data and normalized by transcripts per million (TPM). **G,** Bar plots showing the GO-term analysis of H3K27me3 DRs (identified in (B)) associated genes.

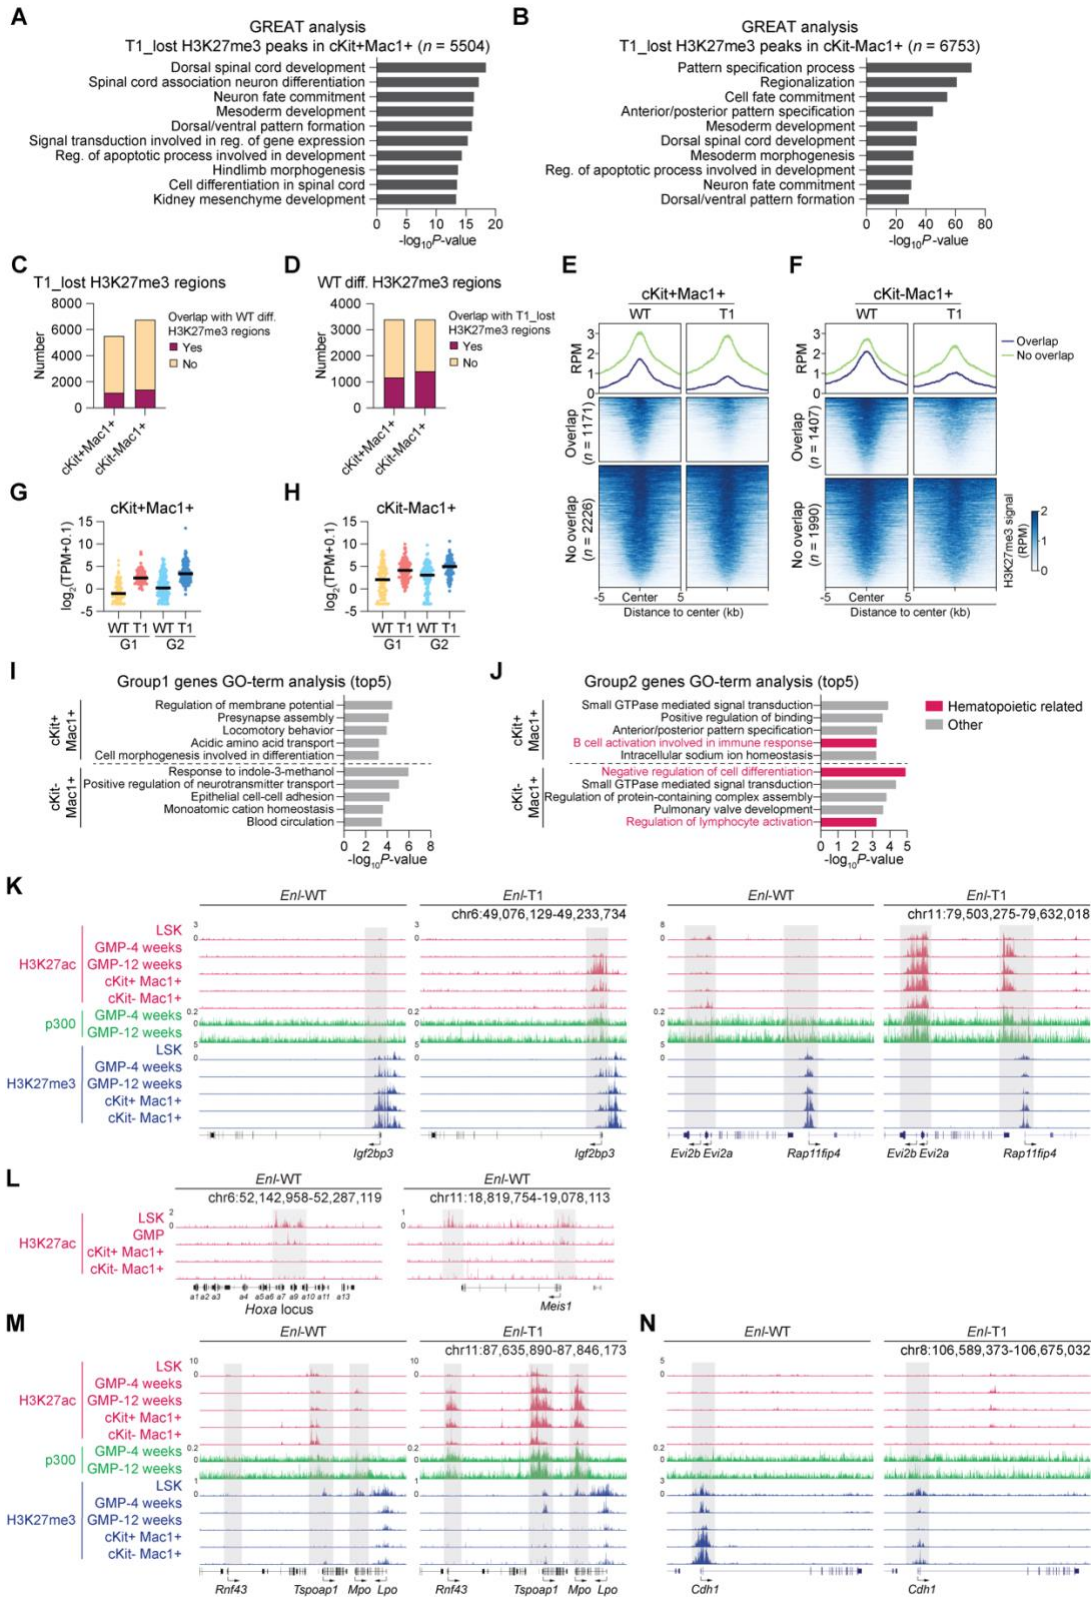

**Supplementary Figure S15. Differentiation-associated gain of H3K27me3 is impaired in *Enl*-mutated hematopoietic cells.** **A, B**, GREAT analysis of T1-lost H3K27me3 DRs in cKit<sup>+</sup>Mac1<sup>+</sup> (**A**) and cKit<sup>-</sup>Mac1<sup>+</sup> (**B**) cells. See Supplementary Tables S27 and S28. **C**, Stacked bar plots showing the numbers of T1-lost H3K27me3 DRs in cKit<sup>+</sup>Mac1<sup>+</sup> and cKit<sup>-</sup>Mac1<sup>+</sup> cells that are overlapped (purple) or not overlapped (yellow) with differentiation-associated H3K27me3 DRs (identified in **Supplemental Fig. 14B**). **D**, Stacked bar plots showing the numbers of differentiation associated H3K27me3 DRs (identified in **Supplemental Fig. 14B**) that are overlapped (purple) or not overlapped (yellow) with T1-lost H3K27me3 DRs in cKit<sup>+</sup>Mac1<sup>+</sup> and cKit<sup>-</sup>Mac1<sup>+</sup> cells. **E, F**, Average occupancies (top) and heatmap (bottom) of differentiation associated-H3K27me3 DRs (identified in **Supplemental Fig. 14B**) overlapped or not overlapped with T1 lost H3K27ac DRs in cKit<sup>+</sup>Mac1<sup>+</sup> (**E**) and cKit<sup>-</sup>Mac1<sup>+</sup> (**F**) cells. See Supplementary Table S22. **G, H**, Dot plots evaluating the expression difference between group1 and group2 genes in *Enl*-WT or T1 cKit<sup>+</sup>Mac1<sup>+</sup> (**G**), cKit<sup>-</sup>Mac1<sup>+</sup> (**H**) cells. The mean value is highlighted by the black bar in each group. Expression is normalized by log<sub>2</sub>(TPM+0.1). See Supplementary Table S30. **I, J**, Bar plots showing the GO-term analysis of group1 (**I**) and group2 (**J**) genes in cKit<sup>+</sup>Mac1<sup>+</sup> (top) and cKit<sup>-</sup>Mac1<sup>+</sup> (bottom). Hematopoietic related pathways are highlighted by red. **K**, The genome browser view of H3K27ac, p300 and H3K27me3 CUT&Tag or ChIP-seq signals at genes exhibiting T1-induced changes in both H3K27ac and H3K27me3 in indicated *Enl*-WT or T1 hematopoietic populations. **L**, The genome browser view of H3K27ac CUT&Tag signals at *Hoxa* (left) and *Meis1* (right) gene locus in *Enl*-WT hematopoietic populations with low signal scale. **M, N**, The genome browser view of H3K27ac, p300 and H3K27me3 CUT&Tag or ChIP-seq signals at genes exhibiting T1-induced changes in H3K27ac (**M**) or T1-induced changes in H3K27me3 (**N**) in indicated *Enl*-WT or T1 hematopoietic populations.

233

234

235 **Supplementary Figure S16**

**A**

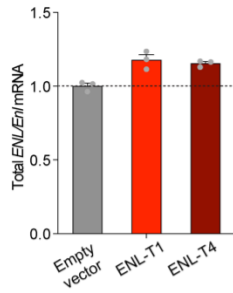

**B**

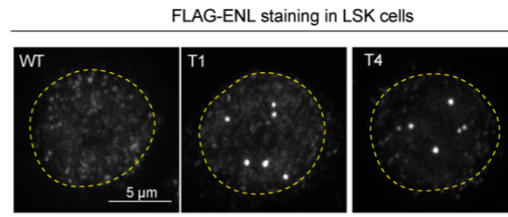

**C**

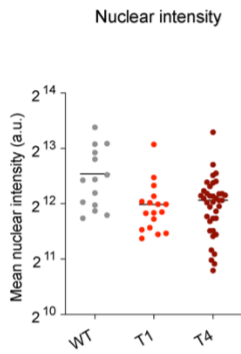

**D**

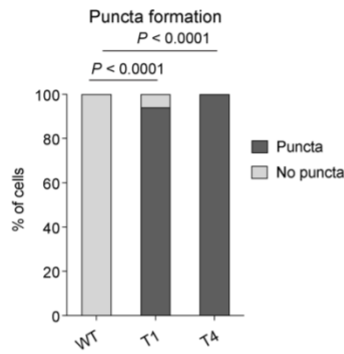

**E**

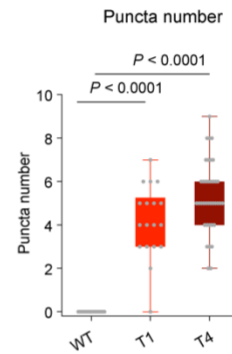

**F**

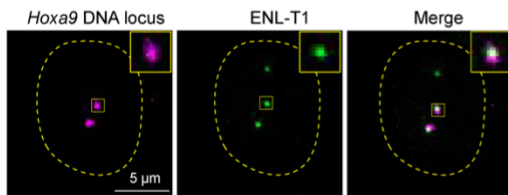

**G**

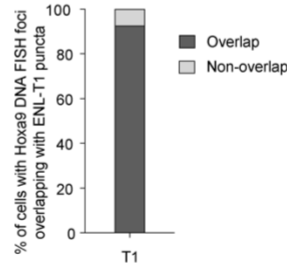

**H**

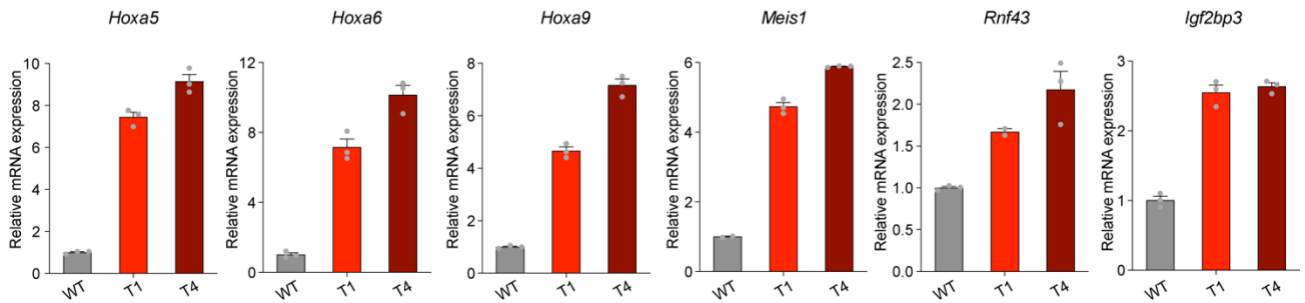

236  
237

**Supplementary Figure S16. ENL mutants form condensate at key target genes and increase gene expression in HSPCs.** **A**, RT-qPCR analysis showing total mRNA levels of human and mouse *ENL/Enl* in LSK cells expressing empty vector or indicated human FLAG-*ENL* transgenes. The primers used for RT-qPCR can detect both human and mouse *ENL/Enl*. Error bars represent mean  $\pm$  SEM ( $n = 3$ ). **B**, Representative images of anti-FLAG IF staining in LSK cells expressing indicated FLAG-*ENL* transgenes. **C-E**, Nuclear intensity (**C**), percentage of nuclei with or without FLAG-ENL puncta (**D**), and the number of FLAG-ENL puncta (**E**) in each nucleus in LSK cells. Error bars represent mean  $\pm$  SEM. *P* values using unpaired, two-tailed Student's *t*-test. **F, G**, Representative images (**F**) and quantification (**G**) showing percentage of LSK cells expressing FLAG-*ENL*-T1 transgene at least one *Hoxa9* DNA locus overlapping with an ENL-T1 puncta.  $n = 67$ . *P* value using unpaired, two-tailed Student's *t*-test. **H**, RT-qPCR analysis showing mRNA expression of *Hoxa5/6/9*, *Meis1*, *Rnf43*, *Igf2bp3* in LSK cells expressing indicated FLAG-*ENL* transgenes. Error bars represent mean  $\pm$  SEM ( $n = 3$ ).

239 **Supplementary Figure S17**

**A**

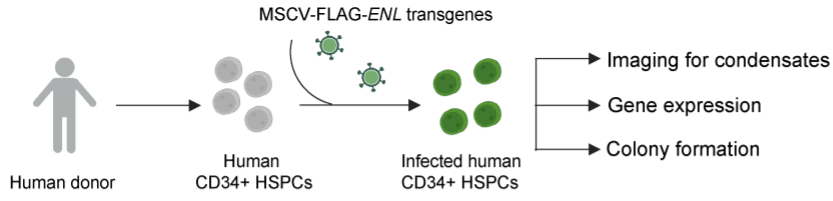

**B**

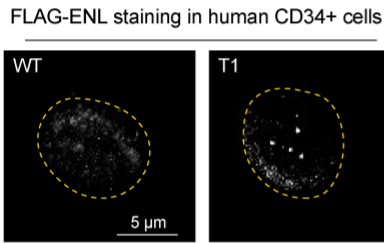

**C**

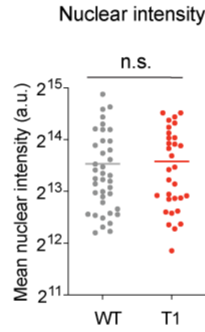

**D**

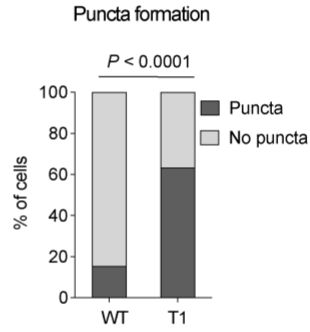

**E**

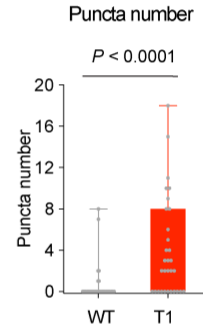

**F**

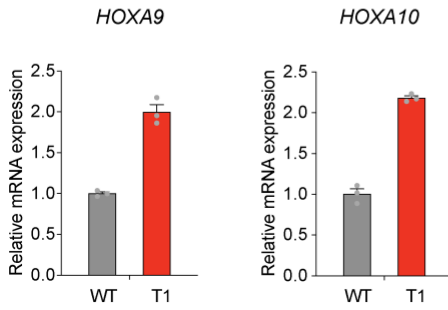

**G**

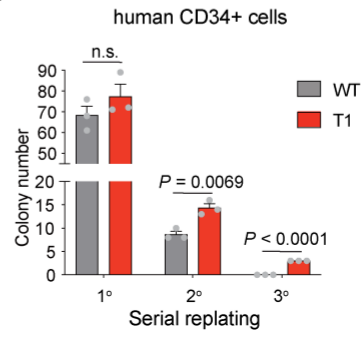

240

241



**Supplementary Figure S17. Condensate formation property correlates with mutant *ENL*'s oncogenic function in human CD34<sup>+</sup> HSPCs.** **A**, Schematic representation of the transduction of various FLAG-tagged *ENL* transgenes in human CD34<sup>+</sup> HSPCs and subsequent experiments (shown in **B-G**). **B**, Representative images of anti-FLAG IF staining in human CD34<sup>+</sup> HSPCs expressing indicated FLAG-*ENL* transgenes. **C-E**, Nuclear intensity (**C**), percentage of nuclei with or without FLAG-*ENL* puncta (**D**), and the number of FLAG-*ENL* puncta (**E**) in each nucleus in human CD34<sup>+</sup> HSPCs. Error bars represent mean  $\pm$  SEM. *P* values using unpaired, two-tailed Student's *t*-test. **F**, RT-qPCR analysis showing mRNA expression of *HOXA9/10* in human CD34<sup>+</sup> HSPCs expressing indicated FLAG-*ENL* transgenes. Error bars represent mean  $\pm$  SEM (*n* = 3). **G**, Quantification of colonies formed by human CD34<sup>+</sup> HSPCs expressing indicated FLAG-*ENL* transgenes. Error bars represent mean  $\pm$  SEM (*n* = 3). *P* value using unpaired, two-tailed Student's *t*-test.

243 **Supplementary Figure S18**

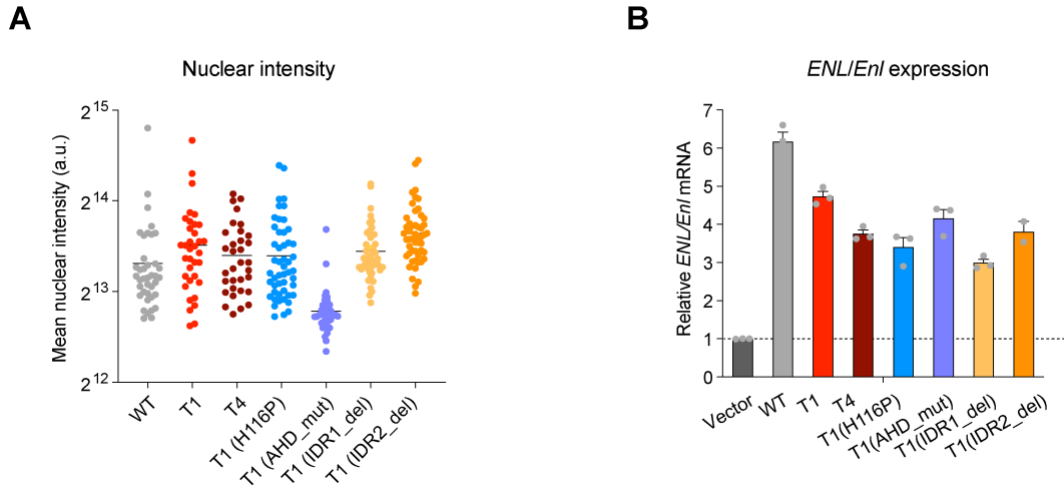

244

**Supplementary Figure S18. Expression levels of different FLAG-ENL transgenes in LSK cells. A,** Mean nuclear intensity of indicated FLAG-ENL proteins based on anti-FLAG IF staining in LSK cells. Line indicates mean value. **B,** RT-qPCR analysis showing total mRNA levels of human and mouse *ENL/Enl* in LSK cells expressing empty vector or indicated human FLAG-ENL transgenes. The primers used for RT-qPCR can detect both human and mouse *ENL/Enl*. Error bars represent mean  $\pm$  SEM ( $n = 3$ ).

245

246 **Supplementary Figure S19**

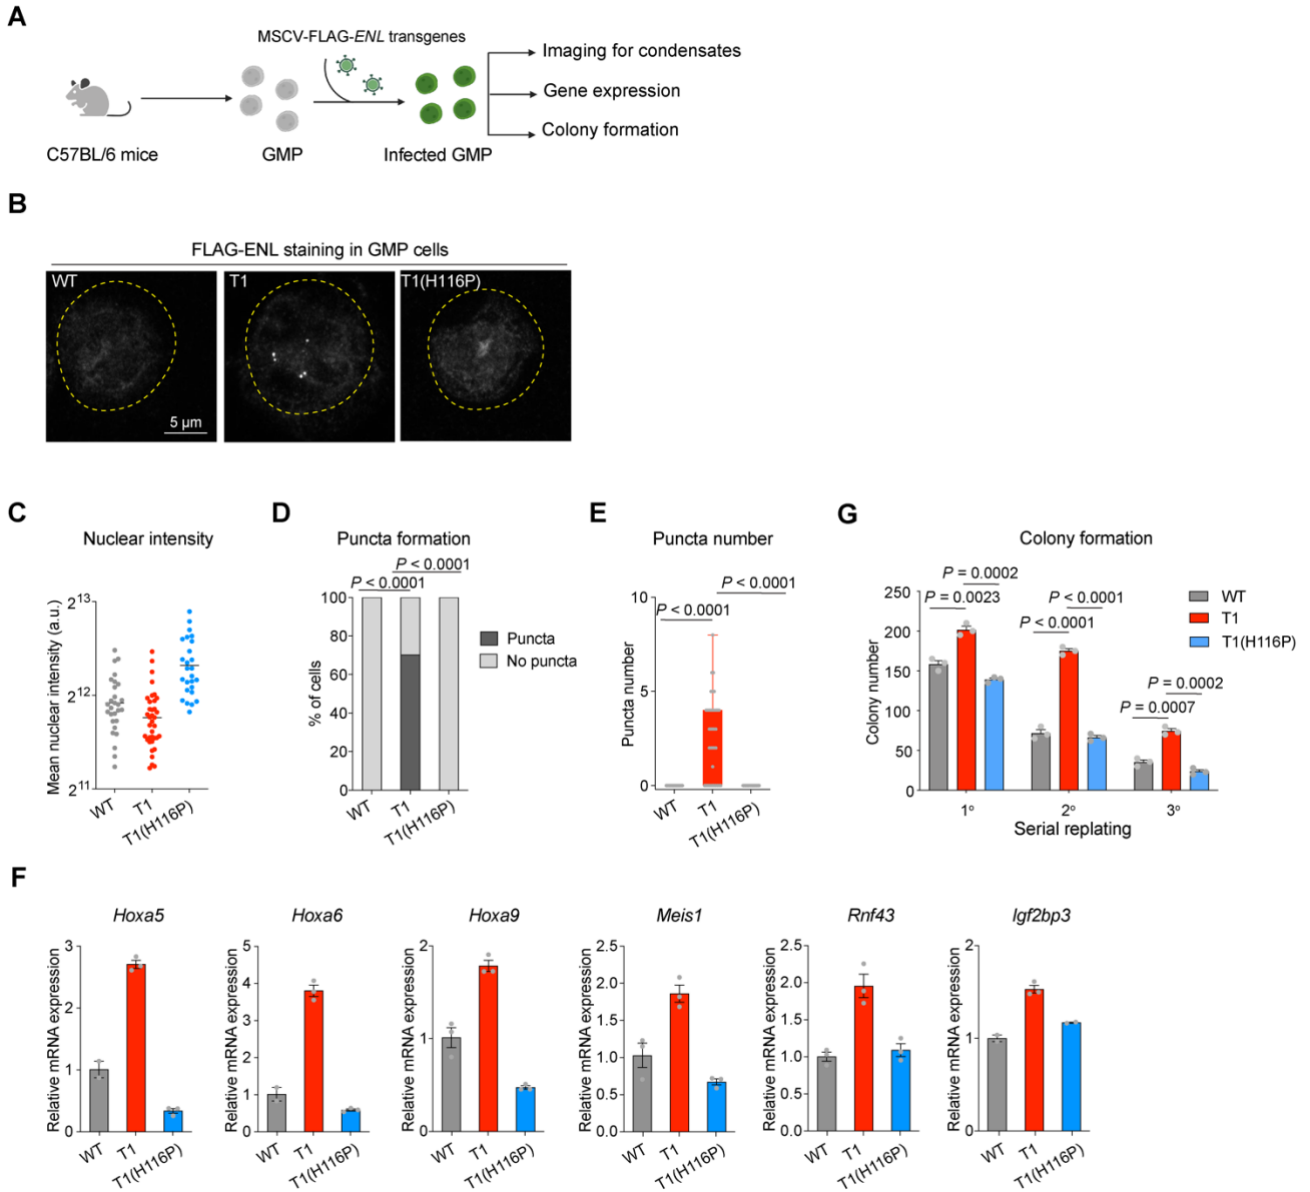

247

248

**Supplementary Figure S19. Condensate formation property correlates with mutant ENL's oncogenic function in GMP cells.** **A**, Schematic representation of the transduction of various FLAG-tagged *ENL* transgenes in GMP cells and subsequent experiments (shown in **B-G**). **B**, Representative images of anti-FLAG IF staining in GMP cells expressing indicated FLAG-*ENL* transgenes. **C-E**, Nuclear intensity (**C**), percentage of nuclei with or without FLAG-ENL puncta (**D**), and the number of FLAG-ENL puncta (**E**) in each nucleus in GMP cells. Error bars represent mean  $\pm$  SEM. *P* values using unpaired, two-tailed Student's *t*-test. **F**, RT-qPCR analysis showing mRNA expression of *Hoxa5/6/9*, *Meis1*, *Rnf43*, *Igf2bp3* in GMP cells expressing indicated FLAG-*ENL* transgenes. Error bars represent mean  $\pm$  SEM ( $n = 3$ ). **G**, Quantification of colonies formed by GMP cells expressing indicated FLAG-*ENL* transgenes. Error bars represent mean  $\pm$  SEM ( $n = 3$ ). *P* value using unpaired, two-tailed Student's *t*-test.

250 **Supplementary Figure S20**

**A**

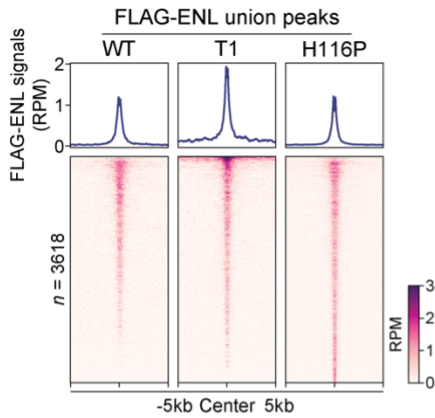

**B**

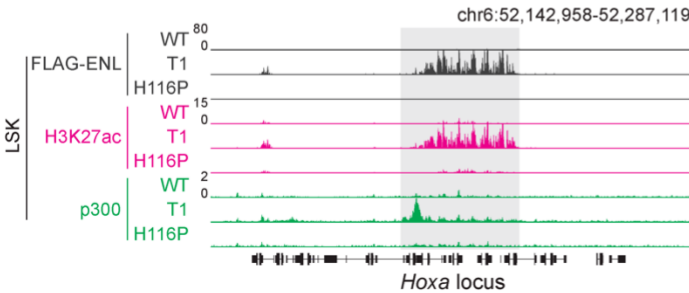

**C**

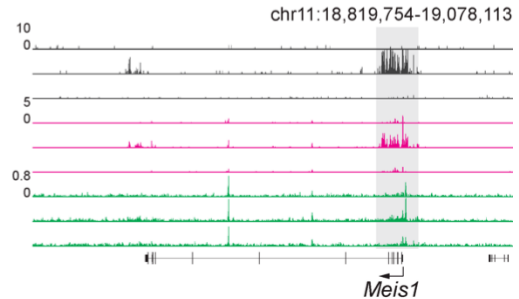

251

**Supplementary Figure S20. Disrupting condensate formation by the H116P mutation reduces ENL-T1-induced increases in chromatin occupancy of FLAG-ENL, H3K27ac, and p300 at a subset of target genes.** **A**, Average occupancies (top) and heatmap (bottom) representation of FLAG-ENL-bound peak regions in LSK cells expressing the indicated FLAG-ENL transgenes. The CUT&Tag signals are normalized by reads per million (RPM). See Supplementary Table S31. **B**, **C**, Genome browser view of FLAG-ENL, H3K27ac, and p300 CUT&Tag or ChIP-seq signals at *Hoxa* (**B**) and *Meis1* (**C**) gene loci in LSK cells expressing the indicated FLAG-ENL transgenes.

252

253 **Supplementary Figure S21**

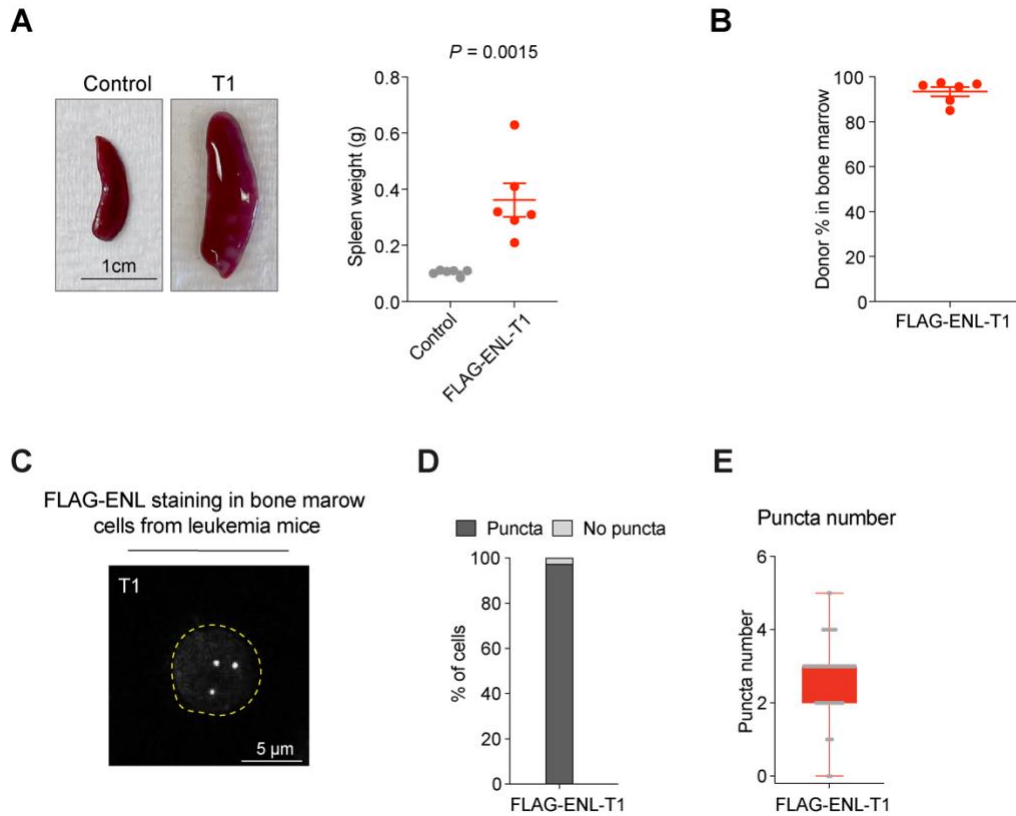

254

255 **Supplementary Figure S21. Impact of mutant ENL on leukemia development and condensate**  
 256 **formation.** **A**, Representative images (left) and weight quantification (right) of spleen harvested from  
 257 C57BL/6 recipient mice received LSK cells expressing the FLAG-ENL-T1 transgenes. Control, the age-  
 258 and sex-matched C57BL/6 mice. Scale bar, 1 cm; Bars represent the median ( $n = 6$ ).  $P$  value using  
 259 unpaired, two-tailed Student's  $t$ -test. **B**, Flow cytometric quantification of FLAG-ENL-T1 expressing  
 260 cells ( $CD45.2^+CD45.1^-$ ) in the bone marrow harvested at terminal time points from C57BL/6 recipient  
 261 mice. Bars represent the median ( $n = 6$ ). **C**, Representative images of anti-FLAG IF staining in cells  
 262 harvested from C57BL/6 recipient mice that received LSK cells expressing the FLAG-ENL-T1 transgene.  
 263 **D, E**, Percentage of nuclei with or without FLAG-ENL puncta (**D**), and the number of FLAG-ENL  
 264 puncta (**E**) in each nucleus in cells harvested from C57BL/6 recipient mice that received LSK cells  
 265 expressing the FLAG-ENL-T1 transgene. Error bars represent mean  $\pm$  SEM.  $P$  values using unpaired,  
 266 two-tailed Student's  $t$ -test.

267

268 **Supplementary Figure S22**

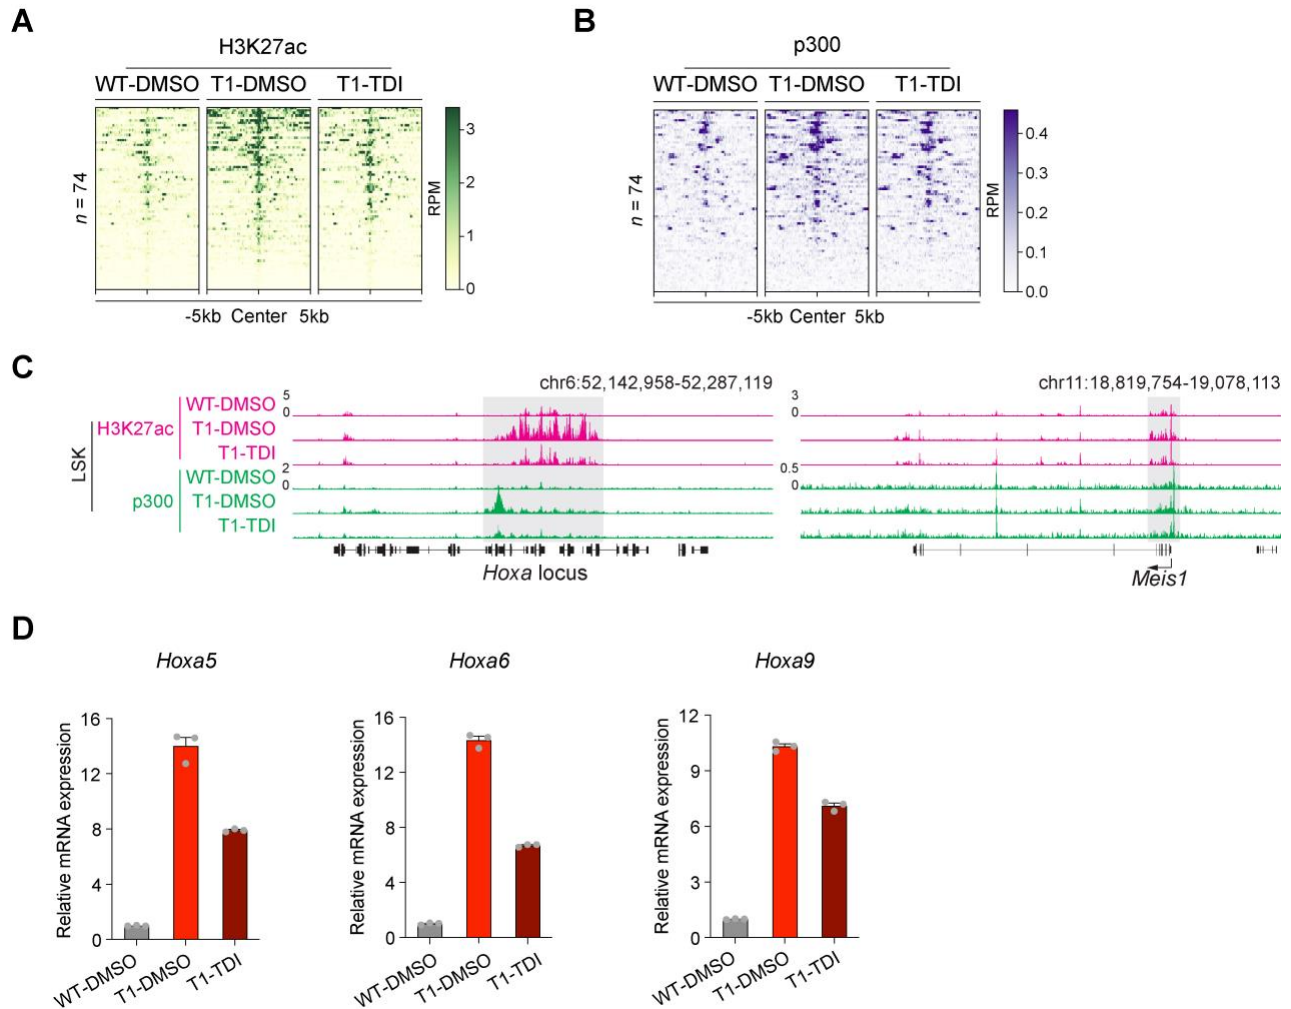

269 **Supplementary Figure S22. Small molecule inhibition of the acetyl-binding activity of mutant ENL**  
 270 **suppresses chromatin function and *Hoxa* cluster gene activation in LSK cells. A, B, Heatmap**  
 271 **showing H3K27ac (A) and p300 (B) at genomic regions that exhibit T1-induced increases in FLAG-**  
 272 ***ENL* and H3K27ac occupancies in LSK cells expressing indicated FLAG-ENL variants under DMSO or**  
 273 **TDI-11055 treatment. See Supplementary Table S33. C, Genome browser view of H3K27ac and p300**  
 274 **signals at selected genes (*Hoxa* locus, *Meis1*) under DMSO and TDI-11055 treatment conditions in LSK**  
 275 **cells expressing indicated FLAG-ENL variants. D, RT-qPCR analysis showing mRNA expression of**  
 276 ***Hoxa5/6/9* in LSK cells expressing indicated FLAG-ENL variants under DMSO or TDI-11055 treatment.**  
 277 **Error bars represent mean  $\pm$  SEM ( $n = 3$ ).**  
 278

279

280 **Supplementary Figure S23**

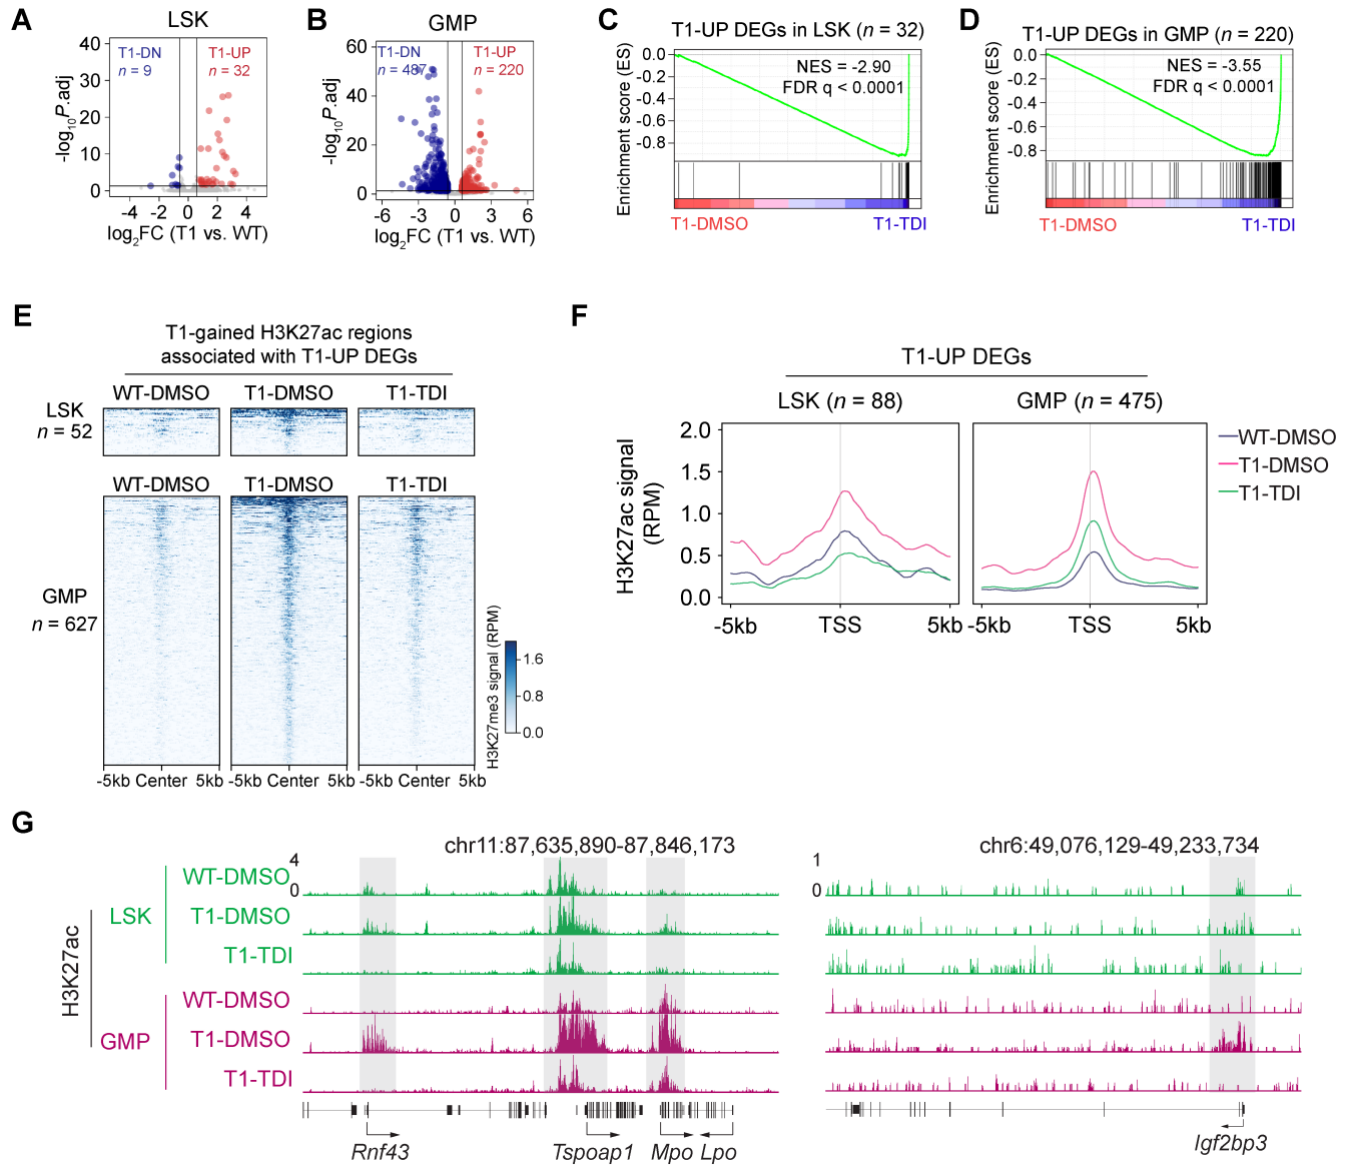

281

282



**Supplementary Figure S23. Small molecule inhibition of the acetyl-binding activity of mutant ENL impairs its chromatin and transcriptional function in HSPCs.** **A, B,** Volcano plots showing the DEGs between *Enl*-WT and T1 under DMSO treatment (see workflow in **Fig. 6L**) in LSK (**A**) and GMP (**B**) cells. T1-UP and DN DEGs are highlighted in red and blue, respectively. FC, fold change; *P*.adj, adjusted *P*-value. See Supplementary Tables S34 and S35. **C, D,** GSEA plots evaluating transcriptional changes in *Enl*-T1 LSK (**C**) and GMP (**D**) upon TDI-11055 treatment (10  $\mu$ M for 48 hours) with T1-UP DEGs identified in LSK (**A**) and GMP (**B**). FDR, false discovery rate; NES, normalized enrichment score. **E,** Heatmap showing H3K27ac signals on T1-gained H3K27ac DRs associated with T1-UP DEGs in LSK (top) and GMP (bottom) under DMSO or 10  $\mu$ M TDI-11055 treatment conditions (see schematic in **Fig.6P**). **F,** Average occupancies of H3K27ac on the promoters of T1-UP DEGs in LSK (left) and GMP (right) under DMSO or 10  $\mu$ M TDI-11055 treatment conditions (see schematic in **Fig.6P**). TSS, transcriptional start site. **G,** Genome browser view of H3K27ac CUT&Tag signals at selected genes (*Rnf43*, *Tspoap1*, *Mpo*, *Igf2bp3*) under DMSO and TDI-11055 treatment conditions in LSK and GMP.

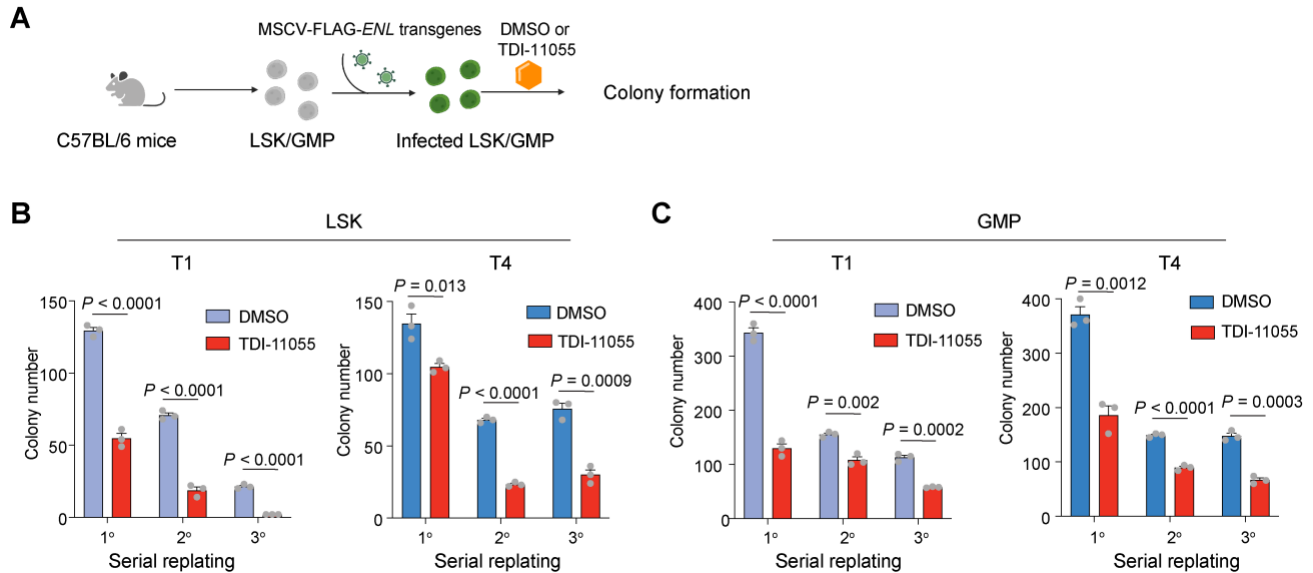

285

**Supplementary Figure S24. Small molecule inhibition of the acetyl-binding activity of mutant ENL inhibits its impact on the self-renewal property in HSPCs.** **A**, Schematic representation of transduction of FLAG-ENL transgenes in LSK or GMP cells and subsequent experiments. **B**, **C**, Quantification of colonies formed by LSK (**B**) and GMP (**C**) cells expressing indicated FLAG-ENL transgenes under the treatment of DMSO or TDI (1 $\mu$ M). Error bars represent mean  $\pm$  SEM ( $n = 3$ ).  $P$  values using unpaired, two-tailed Student's  $t$ -test.
